# Supplementary material
Source: ML conference proceedings conference paper supplement (https://openreview.net/forum?id=GDdGGXF4Kg)
Supplement: supplementary_material [file hyperlinked_submission_with_supp_materials.pdf › neurips_2025_supp_materials/hyperlinked_submission_with_supp_materials.pdf]

---

# A Closer Look at NTK Alignment: Linking Phase Transitions in Deep Image Regression

---

Anonymous Author(s)

Affiliation

Address

email

## Abstract

1 Deep neural networks trained with gradient descent exhibit varying rates of learning  
2 for different patterns. However, the complexity of fitting models to data makes  
3 direct elucidation of the dynamics of learned patterns challenging. To circumvent  
4 this, many works have opted to characterize phases of learning through summary  
5 statistics known as order parameters. In this work, we propose a unifying frame-  
6 work for constructing order parameters based on the Neural Tangent Kernel (NTK),  
7 in which the relationship with the data set is more transparent. In particular, we  
8 derive a local approximation of the NTK for a class of deep regression models  
9 (SIRENs) trained to reconstruct natural images. In so doing, we analytically con-  
10 nect three seemingly distinct phase transitions: the emergence of wave patterns  
11 in residuals (a novel observation), loss rate collapse, and NTK alignment. Our  
12 results provide a dynamical perspective on the observed biases of SIRENs, and  
13 deep image regression models more generally.

## 14 1 Introduction

15 Classical learning theory suggests that models with sufficient capacity - specifically, one whose  
16 parameters outnumber the training samples - tend to "memorise" individual examples rather than  
17 learn underlying patterns, leading to poor generalisation [1]. However, while Deep Neural Networks  
18 (DNNs) are typically over-parameterised, a growing body of research highlights the role of Gradient  
19 Descent (GD) in constraining their *effective* capacity [2, 3]. A recurring observation is that GD biases  
20 neural networks to prioritise learning simple patterns before more complex ones, resulting in distinct  
21 phases of learning [4, 5]. These phases are characterised by changes in the collective evolution  
22 of the network's weights, which can be quantified by statistics known as order parameters [6, 7,  
23 8, 9]. Although numerous authors have independently proposed statistics to account for changes  
24 in convergence rate [10, 11] - and correspondingly, the memorisation [12] and over-fitting [13] of  
25 complex/noisy patterns - their interrelationships remain under-explored. More significantly, these  
26 existing approaches provide limited insight into the actual content being learned during each phase -  
27 and consequently, which patterns models systematically struggle to learn. Addressing these gaps is  
28 essential to developing a unified understanding of learning dynamics in DNNs.

29 A major obstacle in understanding this inductive bias lies in the inherent complexity of GD itself.  
30 While conceptually GD can be viewed as a function mapping from the dataset, hyperparameters,  
31 and initial weights to the final learned weights, in practice, the thousands of iterations through high-  
32 dimensional parameter space obscure the relationship between order parameters and the underlying  
33 dataset characteristics. In recent years, the Neural Tangent Kernel (NTK) [14] has emerged as an  
34 alternative perspective on the dynamics of learning, recasting them in terms of the evolution of  
35 pointwise errors. Critically, in a phenomenon known as Neural Tangent Kernel Alignment (NTKA),  
36 the eigenspectra of the NTK undergo a sudden transition of their own, spontaneously aligning with

the class structure of the dataset without direct supervision. NTKA has been widely documented and is suggested as a reason why real-world DNNs often outperform their infinite-width limit counterparts [15, 16, 17, 18, 19, 20]. However, despite repeated empirical demonstrations of NTKA, theoretical exploration of the phenomenon has been largely restricted to classification problems with toy models, such as two-layer neural networks [21, 22], and deep linear networks [22].

In this work, we move beyond these simple classification models and study NTKA in a considerably more complex setting: deep image regression using multi-layer SIRENs [23]. These Implicit Neural Representations (INRs) learn mappings from  $\mathbb{R}^2 \rightarrow \mathbb{R}$ , representing images as continuous functions, and find increasing application in tasks such as super-resolution. Despite the low input dimensionality, the depth and non-linear (sinusoidal) activations of these networks pose significant analytical challenges, exceeding the complexity of previously studied models. However, in addition to facilitating visualisation, this low-dimensionality permits us to leverage insights from computer vision to introspect the learning process. Our study is structured around three primary contributions:

1. We derive novel approximations for the local structure of the SIREN NTK, allowing us to approximate: the principal eigenvector (3.3); order parameters such as the minimum value of the Cosine NTK (3.4); and the correlation lengthscale (3.2). In so doing, we theoretically establish connections between the onset of NTKA and other dynamical phase transitions.
2. We identify a novel learning phase in deep image regression, characterized by the appearance of diffusion-like wavecrests in the residuals, and relate this behaviour to the evolution of the NTK.
3. We experimentally verify that the critical points for these different phase transitions cluster in time. We also empirically investigate the impact of image complexity and SIREN hyperparameters on the occurrence and timing of phase transitions, and provide evidence that NTK alignment in image regression tasks occurs in response to difficulties in modelling edges.

## 2 Preliminaries

In this work, we consider 2D grayscale images, where pixel coordinates and their intensity form a dataset  $\mathcal{D}$  of  $N$  samples indexed with  $i$ ,  $(x_i, I(x_i))$ , where  $x_i \in \mathbb{R}^2$  and  $I : \mathbb{R}^2 \mapsto \mathbb{R}$ . On this dataset, we fit SIREN models  $f(x; \theta)$  of depth  $N_l$ , defined recursively by:  $h^{(0)} = x$ ;  $h^{(l)} = \sin \omega_0 (W^{(l)} h^{(l-1)} + b^{(l)})$ ;  $f(x; \theta) = W^{(N_l)} h^{(N_l-1)} + b^{(L)}$ . Here  $h^{(l)}$  denotes the output of the  $l$ -th layer,  $\theta = \{W^{(l)}, b^{(l)} | l = 1, \dots, N_l\}$  is the set of learnable parameters, and  $\omega_0$  is a bandwidth hyperparameter.  $\omega_0$  is generally chosen to ensure the sin function spans multiple periods (and thus frequencies) over the inputs. In the continuum limit, we assume the data is distributed uniformly  $P_{data}(x) = \text{Vol}(\mathcal{D})^{-1}$ . We identify two fields: the local residual field  $r(x; \theta(t)) = I(x) - f(x; \theta(t))$ , and gradient field  $\nabla_\theta f(x; \theta(t))$ . Dynamics are induced by gradient flow  $\dot{\theta} = -\nabla_\theta L$  on the mean square error:  $L(\theta) = \frac{1}{2\text{Vol}(\mathcal{D})} \int dx r(x; \theta)^2$ . Through the chain rule, the residuals evolve as follows:

$$\dot{r}(x; \theta(t)) = \nabla_\theta r(x; \theta(t)) \cdot \dot{\theta} \quad (1)$$

$$= -\frac{1}{\text{Vol}(\mathcal{D})} \int dx' r(x') \nabla_\theta r(x; \theta(t)) \cdot \nabla_\theta r(x'; \theta(t)) \quad (2)$$

$$= -\int dx' r(x') \underbrace{\left( \frac{1}{\text{Vol}(\mathcal{D})} \nabla_\theta f(x; \theta(t)) \cdot \nabla_\theta f(x'; \theta(t)) \right)}_{K_{NTK}(x, x'; \theta(t))} \quad (3)$$

In the last line, we defined the NTK. Equation 3 is a linear dynamical system with a time-varying kernel. The eigenvectors  $v_k(x, t)$  represent distinct normal modes of the dataset, each learning at a rate governed by its associated eigenvalue  $\lambda_k(t)$ . This framework formalizes the intuitive notion that neural networks learn different patterns at different speeds.

Finally, for notational brevity, we will drop the explicit dependence on  $\theta$ , and write  $x' = x + u$ . We also define a kernel closely related to the NTK, the Cos NTK:

$$C_{NTK}(x, x + u) = \frac{1}{\text{Vol}(\mathcal{D})} \frac{\nabla_\theta f(x) \cdot \nabla_\theta f(x + u)}{\|\nabla_\theta f(x)\| \|\nabla_\theta f(x + u)\|} \quad (4)$$

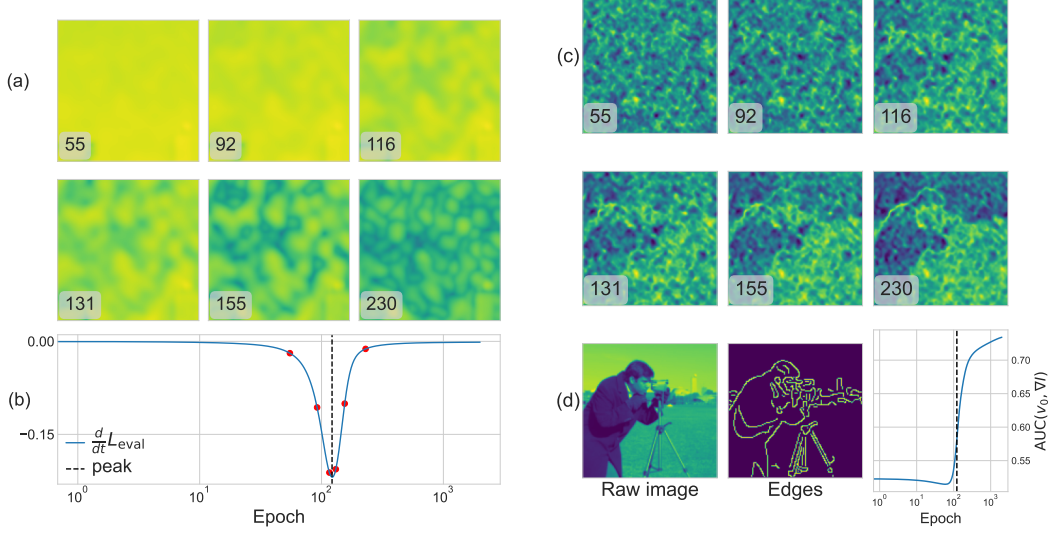

Figure 1: **A Single Phase Transition Through Three Lenses:** (a) The magnitude of the residuals over the training process. Near the critical point we see the formation of wavecrests. (b) Evolution of evaluation loss rate during training, which reaches a peak at the critical point. (c) Evolution of the principle eigenvector of the NTK, which reveals a sudden shift from disorder to structure. (d) Quantification of NTKA in terms of alignment between edges and the principal eigenvector.

### 77 3 Deriving Order Parameters from the NTK

78 We illustrate the different phases of learning in Figure 1; we train a (five-layer, 256-unit wide) SIREN  
 79 model on a  $128 \times 128$  grayscale image using full-batch GD (learning rate= $10^{-3}$ ). We evaluate the  
 80 model on super-resolution at  $256 \times 256$ . We examine the learning dynamics through three different  
 81 lenses, each revealing a sudden shift. These shifts are quantitatively identified using statistics, known  
 82 as order parameters. We demonstrate below how order parameters for each transition may be related  
 83 to a common set of features, which control the local NTK structure. The three lenses are as follows:

- 84 • **Spatial Distribution of Residuals:** Early in training, the loss decreases uniformly over the dataset  
 85 (Drift Phase). However, at a critical point, we observe the formation of "wave-crests" corresponding  
 86 to regions of low-loss, which propagate across the dataset (Diffusion Phase). To the best of our  
 87 knowledge, we are the first to report this behaviour in SIREN models. We attribute this behaviour  
 88 (in sec. 3.1) to changes in the equal-time correlation functions of the gradient field  $\nabla_{\theta} f(x)$ , whose  
 89 parameters we derive in Section 3.2.
- 90 • **Principal Eigenvectors of the NTK:** The principal eigenvector  $v_0$  is initially static and appears  
 91 highly-disordered (Disordered Phase). However, at a critical point,  $v_0$  experiences a brief, sudden  
 92 shift, in which it aligns with the edges of the image (Aligned Phase). Although NTKA has  
 93 previously been studied in the context of classification problems [24, 25, 26, 27], there are additional  
 94 subtleties to consider for a regression task such as INR training. To this end, we introduce a metric,  
 95  $\text{AUC}(v_0, \nabla I)$  in Section 3.3 to identify when alignment occurs. We also derive an approximation  
 96 of  $v_0$  based on the local structure of the NTK, as outlined in Sections 3.1 and 3.2.
- 97 • **Training Curve Analysis:** There is a rapid shift in the slope of the training curve, which we call  
 98 the loss rate  $\dot{L}$ . Learning is initially fast (high  $\dot{L}$ ), but after a critical point, slows abruptly (low  $\dot{L}$ ).  
 99 Several works have studied this transition using order parameters, but in this work, we focus on  
 100 the concept of gradient confusion, as described in [13], [11], [12]. In Section 3.4, we derive an  
 101 approximation of this parameter based on the local structure of the NTK outlined in Section 3.2.

#### 102 3.1 Correlation Functions and the Onset of Diffusion

103 The form of equation 3 is reminiscent of the linear response functions in statistical field theory [28, 29]:  
 104 to find the rate of change of the residual field at a point  $x$ , the kernel  $K$  aggregates information

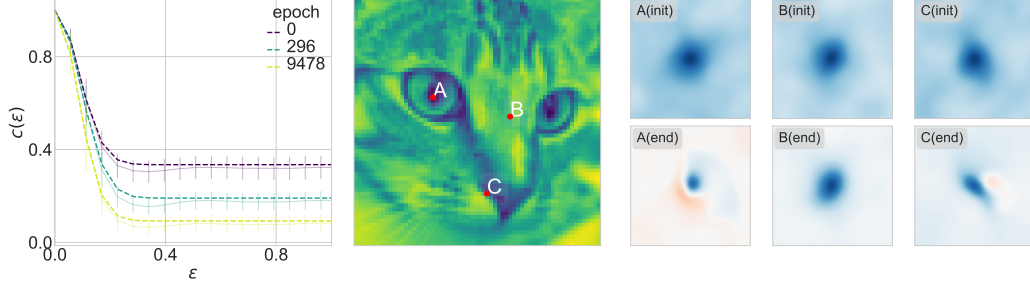

Figure 2: **Spatiotemporal Evolution of the Cosine NTK ( $C_{NTK}$ )**. Left: Global correlation function of the  $C_{NTK}$  at different epochs. Dashed lines show fitted Gaussian approximation from equation 6, and error bars show variance across datasets. Right: Visualization of the  $C_{NTK}$  around three points  $x \in \{A, B, C\}$  for small separations, at the beginning and end of training.

about the residual at points  $x + u$ . To quantify the range of these interactions, we examine the local, equal-time correlation functions for the gradients  $\nabla_{\theta} f(x)$  separated by a distance  $\epsilon$ :

$$k(x, \epsilon) = \mathbb{E}_{\phi} [\nabla_{\theta} f(x) \cdot \nabla_{\theta} f(x + \epsilon \hat{e}_{\phi})] = \mathbb{E}_{\phi} [K_{NTK}(x, x + \epsilon \hat{e}_{\phi})] \quad (5)$$

Here,  $\hat{e}_{\phi}$  denotes a unit vector in direction  $\phi$ . Similarly, the global, equal-time correlation is given by  $k(\epsilon) = \mathbb{E}_x [k(x, \epsilon)]$ . We may define similar quantities for the  $C_{NTK}$ , which we denote by  $c(x, \epsilon)$  and  $c(\epsilon)$ . We expect the range of these interactions to be short, as INRs are often carefully designed to ensure a diagonally dominant NTK[30, 31, 32]. To verify this, we group pairs of datapoints based on their distance, and then compute the mean  $C_{NTK}$  value. For SIREN models, we observe that the equal-time correlation functions are well-approximated by Gaussians of the form<sup>1</sup>:

$$c(\epsilon) \approx (1 - c_{\infty}) e^{-\epsilon^2 / 2\xi_{corr}^2} + c_{\infty} \quad (6)$$

$$k(x, \epsilon) \approx \|\nabla_{\theta} f(x)\|^2 (1 - c_{\infty}(x)) e^{-\epsilon^2 / 2\xi(x)^2} + \|\nabla_{\theta} f(x)\|^2 c_{\infty}(x) \quad (7)$$

This approximation introduces two important order parameters: the first, the correlation length-scale  $\xi_{corr}$ , controls the rate at which correlations decay with distance, defining the range of interactions. The second, the asymptotic value  $c_{\infty}$ , describes the interactions between points at separations  $\epsilon$  much greater than  $\xi$ . Dynamically, we see from the left of Figure 2 that both  $\xi$  and  $c_{\infty}$  evolve during training, and we shall demonstrate that changes in these values account for the onset of diffusion. When  $\mu_r \equiv \mathbb{E}[r]$  and  $c_{\infty}$  decay to zero, the contribution of  $K$  via the background ( $K_{\infty}$ ) becomes dominated by local interactions. Thus we may approximate:

$$K(x, x + u) \approx \|\nabla_{\theta} f(x)\|^2 \exp(-\|u\|^2 / \xi^2(x)) \quad (8)$$

When  $\xi(x)$  is small, the NTK will suppress all contributions to the residual  $\hat{r}(x)$  except from the immediate vicinity of  $x$ . As such, performing a Taylor expansion to second order in  $u$ , we obtain:

$$r(x + u; \theta) \approx r(x; \theta) + u^{\top} \nabla_x r(x; \theta) + \frac{1}{2} u^{\top} \nabla_x^2 r(x; \theta) u \quad (9)$$

Inserting this, along with the NTK approximation, into equation 3, the full integral may be solved using Gaussian integration (full details in Appendix A.2). We obtain:

$$\frac{d}{dt} r(x; \theta) = -2\pi\xi^2(x) \|\nabla_{\theta} f(x)\|^2 r(x) - \pi\xi^4(x) \|\nabla_{\theta} f(x)\|^2 \Delta^2 r, \quad (10)$$

which resembles a standard diffusion equation.

### 3.2 Beyond the Isotropic Gaussian Approximation

Though the isotropic Gaussian approximation of the NTK can explain the appearance of the diffusion wavecrests, empirically, the NTK is anisotropic (see Figure 2). What's more, the isotropic Gaussian

<sup>1</sup>We examine this assumption qualitatively in Figure 12, and numerically in Appendix F.1.

approximation is positive definite, whereas the real NTK takes on negative values. In this section, we develop a better local approximation that overcomes these limitations. Our approach has the additional benefit that we may predict the correlation length-scale, along with other order parameters. Our starting point is the local structure of the Cos NTK. The full details of our derivation are found in Appendix A.3, but the main strategy is to leverage the law of cosines to express the  $C_{NTK}$  as:

$$C_{NTK}(x, x+u) = \frac{\|\nabla_{\theta} f(x)\|^2 + \|\nabla_{\theta} f(x+u)\|^2 - \|\nabla_{\theta} f(x+u) - \nabla_{\theta} f(x)\|^2}{2\|\nabla_{\theta} f(x)\| \|\nabla_{\theta} f(x+u)\|} \quad (11)$$

Performing a Taylor expansion in  $u$  and retaining terms up to second order, we find the Cosine NTK locally takes the form of a Cauchy Distribution:

$$C_{NTK}(x, x+u) \approx \frac{2a_x^2 + u^{\top} D_x}{2a_x^2 + u^{\top} D_x + u^{\top} H_x u}, \quad (12)$$

where we have:

$$a_x = \|\nabla_{\theta} f(x)\|; D_x = \nabla_x \|\nabla_{\theta} f(x)\|^2; H_x = (\nabla_x \nabla_{\theta} f(x))(\nabla_x \nabla_{\theta} f(x))^{\top} \quad (13)$$

To approximate the correlation length-scale, we note that the level sets of equation 12 correspond to ellipses. For a given value  $c$ , the area of the level set can be shown to be (see Appendix A.4):

$$A_{ellipse}(x; c) = \frac{\pi}{\sqrt{\det H}} \left( \frac{2(1-c)}{c} a_x^2 + \frac{(1-c)^2}{4c^2} D^{\top} H^{-1} D \right) \quad (14)$$

To take into account the asymptotic value of  $C_{NTK}$ , we choose  $c = 1/2 + c_{\infty}/2$ . Then:

$$\xi(x) \approx \sqrt{\frac{A_{ellipse}(x; 1/2 + c_{\infty}/2)}{\pi}} \quad (15)$$

### 3.3 Order Parameters for the Onset of NTK Alignment

In the classification problems typically studied in the NTKA literature, the principle eigenvector  $v_0$  is seen to learn class-separating boundaries [24, 25]. Similarly, for our 2D image reconstruction task, we see the NTK learns information about the distribution of edges in the image (Figure 3). To quantify this alignment, we use a Canny Edge Detector [33] to estimate connected image edges. We then quantify the utility of  $v_0$  in predicting edges in terms of average recall, as measured by the area under the Receiver Operating Characteristic Curve (ROC AUC). We denote this measure  $AUC(v_0, \nabla I)$ , and it has the advantage of being insensitive to monotonic transformations of  $v_0$ .

Another hallmark of NTKA is early anisotropic growth of the NTK spectrum [25], as the NTK becomes stretched along a small number of directions correlated with the task. This is especially the case for the principal eigenvalue  $\lambda_0$ , which grows orders of magnitude larger than the next leading eigenvalue. In Section 4.1, we will demonstrate empirically that this is also true for INRs.

The divergence of  $\lambda_0$  enables a particularly simple approximation of the principal eigenvector  $v_0$ . Namely, because the principal eigenvalue is so dominant,  $K_{NTK}$  becomes effectively low-rank, and so power iterations converge quickly. Thus, choosing a vector of ones  $v = 1$  as our initial vector, we expect  $K1/1^{\top}1$  to have strong cosine alignment with the principal eigenvalue. In the continuum limit, this is simply given by:

$$K1/N \rightarrow \mathbb{E}_u[K(x, x+u)] = \mathbb{E}_{\epsilon}[\mathbb{E}_u[K(x, x+u) | \|u\| = \epsilon]] \quad (16)$$

$$= \int_0^{\epsilon_{max}} d\epsilon k(x, \epsilon) P(x, \epsilon) \quad (17)$$

Here,  $P(x, \epsilon)$  denotes the density of points that are located a distance  $\epsilon$  from the point  $x$ , and  $\epsilon_{max}$  is an upper bound on the distance that we assume is much greater than  $\xi_{corr}$ . Close to this  $x^2$ ,  $P(x, \epsilon)$

<sup>2</sup>The true form of  $P(x, \epsilon)$  is complicated and varies from point to point, due to edge effects. However, these effects are suppressed as  $P(x, \epsilon)$  only appears when multiplied the Gaussian  $k_x$ .

grows like  $2\pi\epsilon$ . Thus, leveraging equations 32 and 13, we have:

$$v_0(x) \approx 2\pi a_x^2 \int_0^{\epsilon_{max}} d\epsilon \left[ c_\infty(x) + (1 - c_\infty(x))e^{-\epsilon^2/2\xi^2(x)} \right] \quad (18)$$

$$= 2\pi a_x^2 \left[ c_\infty(x)\epsilon_{max}^2 + \xi^2(x)(1 - c_\infty(x))(1 - e^{-\epsilon_{max}^2/2\xi^2(x)}) \right] \quad (19)$$

$$\approx a_x^2 \left[ c_\infty(x)\text{Vol}(\mathcal{D}) + 2\pi\xi^2(x)(1 - c_\infty(x)) \right] \quad (20)$$

We evaluate the fidelity of this approximation in Appendix F. As we approach the phase transition, the asymptotic values tend towards 0, and the second term dominates. Considering the approximation in equation 15 for the correlation length-scale  $\xi$ , we note that  $v_0(x)$  grows as  $\mathcal{O}(\|\nabla_\theta f(x)\|^4)$ . This implies particular sensitivity to pixels in regions with substantial high-frequency information, such as edges and corners. As natural images tend to be piecewise smooth, pixels on boundaries have the strongest spatial gradients, and are therefore the greatest source of information, being poorly compressible due to the lack of smoothness, and accordingly disagreement in parameter gradients. Given the inability of models to accurately describe sharp discontinuities these edge pixels are considered influential datapoints, which accounts for their prominence within the principal eigenvector. We discuss other parallels between the moments of the NTK and traditional corners detection algorithms in Appendix E. In particular, we introduce another order parameter, termed **MAG-Ma** (Magnitude of the Average Gradient of the Log Gradient-Field Magnitudes), to monitor the breakdown of stationarity (ie local translation invariance) of the NTK. It is obtained as  $\|\mathbb{E}_x[D_x/a_x^2]\|^2$ .

### 3.4 Order Parameters for the Loss Rate Collapse

In [13], [11], [12], and related works, the authors examine the role of gradient alignment statistics in determining the speed of learning under stochastic gradient descent. They note the emergence of negative alignments between batches correlates with a reduction in learning speed. Intuitively, when sample gradients become negatively aligned, the sum of the gradients approaches zero, resulting in a diminished learning signal. The minimum alignment is simply the minimum value of the  $C_{NTK}$ , which we may obtain explicitly from equation 12 as follows (full derivation in Appendix A.5):

$$\min_u C_{NTK}(x, x + u) = \frac{D_x^\top H_x^{-1} D_x}{D_x^\top H_x^{-1} D_x - 8a_x^2} \quad (21)$$

$\min C_{NTK}$  is then simply the minimum of 21 across the whole dataset.

## 4 Experimental Results

**Setup:** We fit SIREN models to a set of thirty  $64 \times 64$  downsampled images and evaluate the MSE  $L_{eval}$  on a super-resolution task (at  $256 \times 256$ ). We used five random seeds and also varied the width, depth and bandwidth  $\omega_0$  (ranges are given in Appendix B.2). In addition to the order parameters described in Section 3, we examine three NTK-based order parameters from the literature: (1) The principal eigenvalue  $\lambda_0$  of the NTK, which diverges at the critical point; (2) The variance of the gradients  $\sigma_\theta^2$ , which peak during the Fast-Slow learning phases [10], and which may be connected (see Appendix A.6) to the trace of the NTK; (3) The Centred Kernel Alignment (CKA) between the NTK and a task kernel  $K_Y$ . For INR regression, we use  $K_Y(x, x + u) = \exp(-50\|I(x) - I(x + u)\|^2)$ . The similarity between kernels is measured using the normalized Hilbert-Schmidt Information Criterion (HSIC), as in [25, 26, 27]. Full experimental details may be found in Appendix B.2.

### 4.1 Examining the Distribution of Critical Points

**Critical points cluster around run-specific times:** The left-hand side of Figure 3 illustrates our procedure for identifying critical points in a given trial. We use a simple peak detector to identify the region of interest for the loss rate  $\dot{L}_{eval}$  and the gradient variance  $\sigma_\theta$ , using the FWHM to define a confidence region. For the  $\min C_{NTK}$ , we look for zero-crossings, with a confidence region constructed from the cumulative variance. For every other order parameter, we fit a sigmoid, where the inflection point marks the critical point, and the slope defines the confidence region (full details

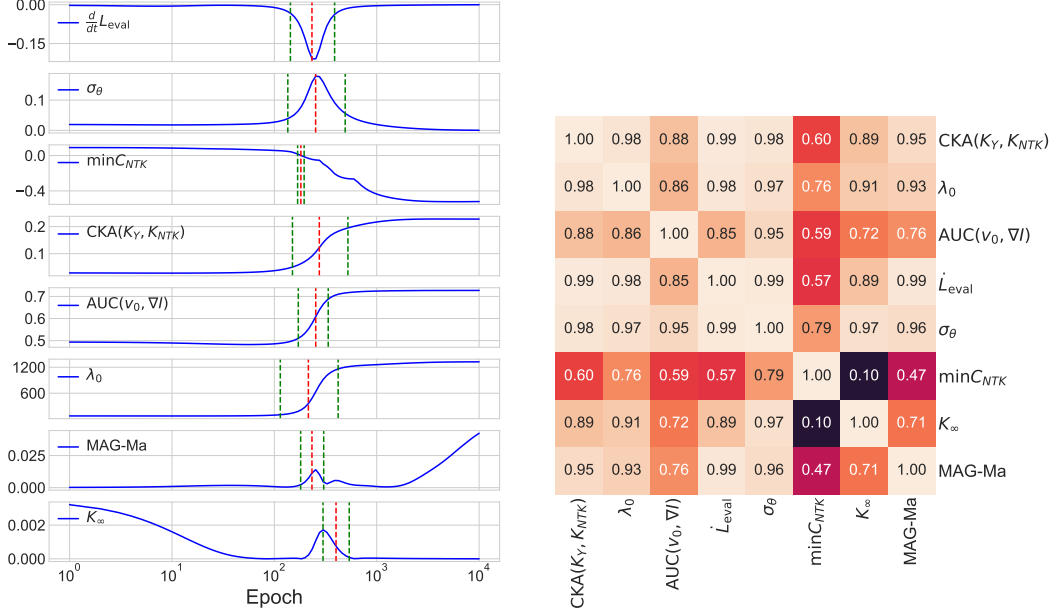

Figure 3: **Alignment of Order Parameters.** Left: Order parameter evolution and critical points during training of a SIREN model on the astro image. The red vertical lines denote the location of the critical points, and the green vertical lines denote confidence regions. Right: Heatmap showing the frequency of intersections between the confidence regions. Additional figures in Appendix G.1.

in Appendix B.2). The right side of Figure 3 demonstrates how frequently these confidence regions overlap across our experimental sweep<sup>3</sup>. Remarkably, the phase transitions described by the order parameters - despite being derived to measure different phenomenon in the literature - consistently occur at the same time during training.

**Hyperparameters alter the timing of run-specific transitions:** in Table 1 we observe that both depth and bandwidth  $\omega_0$  have critical roles in controlling the shift in the loss rate  $\dot{L}_{eval}$ . Generally, increasing depth and decreasing  $\omega_0$  result in earlier transition times  $t_{crit}$ . However, these changes have opposite effects on the model performance: for fixed  $\omega_0$ , deeper models to converge to better (lower  $L_{eval}$ ) solutions faster. However, it seems that lower values of  $\omega_0$  cause models to converge prematurely. This may be deduced by studying the correlation between the final residuals (details in Appendix B.2). For equivalent depth (and therefore, equivalent traditional capacity), models with lower  $\omega_0$  exhibit more correlations in the residuals. This is indicative of remaining structure in the residuals, and can be interpreted as evidence of under-fitting.

## 4.2 Influence of Hyperparameters on Edge Alignment

In the previous section, for fixed depth, we demonstrated that lower  $\omega_0$  correlates with (1) earlier phase transitions, (2) higher validation loss, and (3) correlated residuals. Together, these observations suggest that models with lower  $\omega_0$  converge prematurely, underutilizing their capacity. A natural question arises: which patterns do these models struggle to capture? Given the observed concurrence of loss rate collapse and NTK alignment, we analyse the NTK eigenspectrum to gain some insight.

In Figure 4, we train four SIRENs on the sax dataset with  $(\omega_0, \text{depth}) \in \{15, 60\} \times \{3, 5\}$ . We visualise both the log magnitudes of the parameter gradients,  $\log \|\nabla_\theta(x)f\|^2$ , and the principal eigenvector,  $v_0(x)$ , at the end of training. Additional Figures may be found in Appendix C.2 Generally, we observe that for low  $\omega_0$ ,  $\log \|\nabla_\theta f(x; \theta)\|^2$  swells and concentrates near image edges, becoming sparser, and more correlated with the spatial gradient magnitudes  $\|\nabla_x I(x)\|$  (aggregated statistics may be seen in Table 1). This edge prominence in  $v_0$  matches expectations, as per equation

<sup>3</sup>In computing the coincidence matrix, we exclude trials where the detection of the critical point was unreliable. In Appendix C, we comment on how image properties impact the detection rate.



Table 1: **Variation in model performance with hyperparameters:** Comparing the dependence of transition times ( $t_{crit}$ ), super-resolution performance ( $\log_{10} L_{eval}$ ), and residual correlation on depth and bandwidth. Also featuring expected correlation lengthscale ( $\mathbb{E}[\xi_{corr}(t)]$ ) and correlation between  $\log \|\nabla_{\theta} f(x; \theta)\|$  and  $\|\nabla_x I(x)\|$ . Values are averaged over the same sweep defined in Section 4.1.

| $\frac{\text{depth}}{\omega_0}$ | $\mathbb{E}[\xi_{corr}(t)]$ | AUC( $v_0, I$ ) | Grad. Corr.     | $\log_{10} t_{crit}$ | $\log_{10} L_{eval}$ | Res. Corr.      |
|---------------------------------|-----------------------------|-----------------|-----------------|----------------------|----------------------|-----------------|
| 3/90                            | $0.04 \pm 0.00$             | $0.59 \pm 0.05$ | $0.06 \pm 0.10$ | $2.83 \pm 0.19$      | $-2.01 \pm 0.31$     | $0.35 \pm 0.06$ |
| 3/60                            | $0.06 \pm 0.00$             | $0.60 \pm 0.05$ | $0.16 \pm 0.11$ | $2.84 \pm 0.12$      | $-2.00 \pm 0.32$     | $0.40 \pm 0.07$ |
| 3/30                            | $0.11 \pm 0.00$             | $0.60 \pm 0.05$ | $0.27 \pm 0.08$ | $2.44 \pm 0.25$      | $-1.92 \pm 0.30$     | $0.44 \pm 0.07$ |
| 3/15                            | $0.18 \pm 0.01$             | $0.60 \pm 0.05$ | $0.26 \pm 0.07$ | $2.03 \pm 0.34$      | $-1.83 \pm 0.29$     | $0.48 \pm 0.07$ |
| 4/90                            | $0.04 \pm 0.00$             | $0.67 \pm 0.07$ | $0.23 \pm 0.13$ | $2.66 \pm 0.17$      | $-2.02 \pm 0.32$     | $0.35 \pm 0.06$ |
| 4/60                            | $0.06 \pm 0.00$             | $0.69 \pm 0.07$ | $0.29 \pm 0.12$ | $2.61 \pm 0.16$      | $-2.04 \pm 0.33$     | $0.39 \pm 0.07$ |
| 4/30                            | $0.10 \pm 0.00$             | $0.71 \pm 0.08$ | $0.41 \pm 0.10$ | $2.22 \pm 0.27$      | $-1.99 \pm 0.31$     | $0.41 \pm 0.07$ |
| 4/15                            | $0.16 \pm 0.01$             | $0.68 \pm 0.09$ | $0.55 \pm 0.08$ | $1.87 \pm 0.35$      | $-1.94 \pm 0.30$     | $0.43 \pm 0.07$ |
| 5/90                            | $0.03 \pm 0.00$             | $0.68 \pm 0.07$ | $0.24 \pm 0.14$ | $2.54 \pm 0.18$      | $-2.01 \pm 0.32$     | $0.34 \pm 0.06$ |
| 5/60                            | $0.05 \pm 0.00$             | $0.71 \pm 0.07$ | $0.30 \pm 0.13$ | $2.42 \pm 0.17$      | $-2.05 \pm 0.33$     | $0.39 \pm 0.07$ |
| 5/30                            | $0.09 \pm 0.00$             | $0.73 \pm 0.08$ | $0.39 \pm 0.12$ | $2.15 \pm 0.12$      | $-2.02 \pm 0.32$     | $0.40 \pm 0.07$ |
| 5/15                            | $0.15 \pm 0.01$             | $0.72 \pm 0.08$ | $0.52 \pm 0.09$ | $1.85 \pm 0.27$      | $-1.98 \pm 0.31$     | $0.41 \pm 0.07$ |

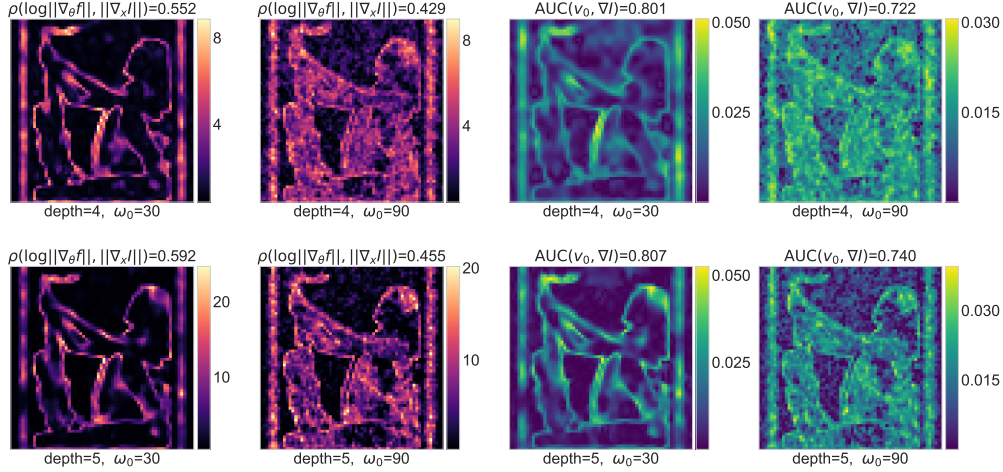

Figure 4: **Effect of Hyperparameters on Edge Alignment:** Left (magma colormap): The norm of the parameter gradients  $\|\nabla_{\theta} f(x)\|$  for  $(\omega_0, \text{depth}) \in \{15, 60\} \times \{3, 5\}$ , labelled with the Pearson correlation  $\rho$  between the log of the norm and the spatial gradient  $\nabla_x I$  of the target image. Right (viridis colormap): visualizing the principal eigenvector  $v_0$  of the NTK for the same models, labelled with the edge alignment score  $\text{AUC}(v_0, \nabla I)$ . More images in Appendix C.2

equation 20,  $v_0(x) \sim \mathcal{O}(\|\nabla_{\theta} f(x)\|^4)$ . Overall, while edge alignment is seen across most settings, it is especially prominent for deeper models with lower values of  $\omega_0$ . This indicates prioritization of these patterns by the NTK, and correspondingly, the patterns the model is most invested in.

## 5 Discussion

To explain the impact of  $\omega_0$ , in Table 1 we track the expected correlation lengthscale  $\mathbb{E}[\xi_{corr}(t)]$  over the course of training. In Figure 17 of the Supplementary Materials, we also examine the variance in  $\xi_{corr}(0)$  with  $\omega_0$  in all models. Consistently, we observe that lower  $\omega_0$  is associated with larger values of the correlation lengthscale. This implies that the NTK integrates information across larger neighborhoods, implicitly averaging over high-frequency features. Consequently, we expect these SIRENs to struggle when modeling high-frequency patterns, which is consistent with other observations in the literature [32]. Following the discussion in Section 3.3, we expect that the difficulty of modeling edges is responsible for the swelling of the parameter gradients  $\|\nabla_{\theta} f(x)\|^2$ .



Intriguingly, we observe that the principal eigenvector becomes sparser as we increase depth, leading to stronger edge alignment, as seen in Table 1. Yet, this sparsification is associated with completely different generalization behavior: models achieve lower validation loss, with less correlated residuals, as we increase depth. We hypothesise a different mechanism underlies this sparsification in comparison with  $\omega_0$ . Figure 4 demonstrates increasing  $\omega_0$  increases the sensitivity of the gradient magnitudes (and hence the principal eigenvector) to noise in the images. For DNNs, gradient magnitudes decompose into a sum across layers, namely  $\|\nabla_{\theta} f\|^2 = \sum_{l=1}^{\text{depth}} \|\nabla_{\theta^{(l)}} f\|^2$ . In effect, preference is given to points which are consistently confusing across layers, thus mitigating the effects of noise.

## 243 6 Related Work

**Neural Tangent Kernels for Implicit Neural Representations:** Previous research has investigated the inductive biases of INRs using the Neural Tangent Kernel (NTK), focusing on aspects such as spectral properties [34] and dependencies on uniformly sampled data [30]. Furthermore, studies by [35] and [36] have analyzed the eigenfunctions of the empirical NTK to elucidate the approximation capabilities of INRs. These investigations, however, primarily examine static properties of the NTK at initialization, which do not account for feature learning dynamics. This is known to be a poor approximation [37]. In contrast, our work concentrates on the evolution of the NTK, aiming to deepen our understanding of how INRs learn to model images.

**Neural Tangent Kernel Alignment** In practical settings, recent studies have shown that during training, the NTK dynamically aligns with a limited number of task-relevant directions [38, 39, 24, 21, 25, 22, 26, 27]. Concurrently, at the eigenfunction level, the modes increasingly reflect salient features of the dataset, such as class-separating boundaries [24, 25], and Fourier frequencies [25]. The widespread occurrence and influence of kernel alignment suggest its critical role in DNN feature learning, contributing to the superior performance of DNNs over models based on infinite-width NTKs [26]. That said, these theoretical discussions often focus on shallow networks [21, 22], toy models [26, 25], and deep linear networks [22]. In contrast, the INRs we study are deep (3-6 layers), nonlinear models that see frequent use in Computer Vision problems.

## 261 7 Conclusion

We have developed new formulations that leverage the NTK to characterise the dynamics of feature learning in deep image regression models (SIRENs). By analytically deriving approximations for the local structure of SIREN NTKs - using Gaussian and Cauchy distributions - we were able to obtain approximate expressions for the correlation lengthscale, the minimum value of the  $C_{NTK}$ , and the principal eigenvector. We related these expressions to order parameters for three phase transitions identified in different dynamical perspectives on learning: the appearance of diffusion wave-crests in residual evolution (first identified in this paper); the collapse of the loss rate; the onset of NTK alignment. We argued, based on these derivations and empirical demonstrations that critical points cluster in time, that these distinct phase transitions share a common, underlying mechanism.

The following picture emerges from our analysis: as long range correlations between gradients decay, residuals only interact with their immediate neighbours (onset of diffusion), leading to increased gradient variance (loss rate collapse) and translational symmetry breaking. In parallel, the growth of the principal eigenvalue or the NTK leads the principal eigenvector to memorize the distribution of influential points, as measured by accumulating gradients. In images, one influential class of points are edges, leading to their prominence in the principal eigenvector (NTK alignment).

In this study, we focused on SIREN models trained on a 2D super-resolution task using full-batch gradient descent. However, SIRENs are used in a variety of inverse problems, and it remains to be seen whether our observations extend to these settings. Future work may also explore the impact of different optimizers, such as ADAM [40], which adaptively adjusts learning rates and may influence the stability and divergence of the principal eigenvalue - a key factor in our study of NTK alignment.

This work has demonstrated that the NTK provides a rich theoretical tool for deriving and relating order parameters to understand training dynamics. We provide new methodology to rigorously study the influence of inductive biases, such as model architectures and hyper-parameters, on the underlying learning process and may have practical utility in diagnosing causes of poor learning outcomes.

## References

- [1] Christopher M. Bishop. *Pattern Recognition and Machine Learning (Information Science and Statistics)*. Springer, 1 edition, 2007.
- [2] Boris Hanin and David Rolnick. Deep relu networks have surprisingly few activation patterns. In *Neural Information Processing Systems*, 2019.
- [3] Maxwell Nye and Andrew M. Saxe. Are efficient deep representations learnable? *ArXiv*, abs/1807.06399, 2018.
- [4] Devansh Arpit, Stanisław Jastrzebski, Nicolas Ballas, David Krueger, Emmanuel Bengio, Maxinder S. Kanwal, Tegan Maharaj, Asja Fischer, Aaron Courville, Yoshua Bengio, and Simon Lacoste-Julien. A closer look at memorization in deep networks. (arXiv:1706.05394), 2017.
- [5] Xiao Zhang and Dongrui Wu. Rethink the connections among generalization, memorization, and the spectral bias of dnns. In *International Joint Conference on Artificial Intelligence*, 2020.
- [6] Yu Feng and Yuhai Tu. Phases of learning dynamics in artificial neural networks in the absence or presence of mislabeled data. *Machine Learning: Science and Technology*, 2(4):043001, jul 2021.
- [7] Cory Stephenson and Tyler Lee. When and how epochwise double descent happens. *ArXiv*, abs/2108.12006, 2021.
- [8] Ziming Liu, Ouail Kitouni, Niklas Nolte, Eric J. Michaud, Max Tegmark, and Mike Williams. Towards understanding grokking: An effective theory of representation learning. *ArXiv*, abs/2205.10343, 2022.
- [9] Liu Ziyin and Masakuni Ueda. Exact phase transitions in deep learning. *ArXiv*, abs/2205.12510, 2022.
- [10] Ravid Shwartz-Ziv and Naftali Tishby. Opening the black box of deep neural networks via information. (arXiv:1703.00810), 2017.
- [11] Karthik A. Sankararaman, Soham De, Zheng Xu, W. Ronny Huang, and Tom Goldstein. The impact of neural network overparameterization on gradient confusion and stochastic gradient descent. (arXiv:1904.06963), 2020.
- [12] Yu Feng and Yuhai Tu. Phases of learning dynamics in artificial neural networks in the absence or presence of mislabeled data. 2(4):043001, 2021. Publisher: IOP Publishing.
- [13] Stanislav Fort, Paweł Krzysztof Nowak, Stanisław Jastrzebski, and Srinu Narayanan. Stiffness: A new perspective on generalization in neural networks. (arXiv:1901.09491), 2020.
- [14] Arthur Jacot, Franck Gabriel, and Clément Hongler. Neural tangent kernel: Convergence and generalization in neural networks. *CoRR*, abs/1806.07572, 2018.
- [15] Boris Hanin and Mihai Nica. Finite depth and width corrections to the neural tangent kernel. (arXiv:1909.05989), 2019.
- [16] Jiaoyang Huang and Horng-Tzer Yau. Dynamics of deep neural networks and neural tangent hierarchy. (arXiv:1909.08156), 2019.
- [17] Laurence Aitchison. Why bigger is not always better: on finite and infinite neural networks. (arXiv:1910.08013), 2020.
- [18] Lenaic Chizat, Edouard Oyallon, and Francis Bach. On lazy training in differentiable programming. (arXiv:1812.07956), 2020.
- [19] Jaehoon Lee, Samuel S. Schoenholz, Jeffrey Pennington, Ben Adlam, Lechao Xiao, Roman Novak, and Jascha Sohl-Dickstein. Finite versus infinite neural networks: an empirical study. (arXiv:2007.15801), 2020.

- 331 [20] Mariia Seleznova and Gitta Kutyniok. Neural tangent kernel beyond the infinite-width limit:  
332 Effects of depth and initialization. (arXiv:2202.00553), 2022.
- 333 [21] Jonas Paccolat, Leonardo Petrini, Mario Geiger, Kevin Tyloo, and Matthieu Wyart. Geometric  
334 compression of invariant manifolds in neural nets. 2021(4):044001.
- 335 [22] Alexander Atanasov, Blake Bordelon, and Cengiz Pehlevan. Neural networks as kernel learners:  
336 The silent alignment effect. (arXiv:2111.00034), 2021.
- 337 [23] Vincent Sitzmann, Julien N.P. Martel, Alexander W. Bergman, David B. Lindell, and Gordon  
338 Wetzstein. Implicit neural representations with periodic activation functions. In *Proc. NeurIPS*,  
339 2020.
- 340 [24] Dmitry Kopitkov and Vadim Indelman. Neural spectrum alignment: Empirical study.  
341 (arXiv:1910.08720), 2020.
- 342 [25] Aristide Baratin, Thomas George, César Laurent, R. Devon Hjelm, Guillaume Lajoie, Pas-  
343 cal Vincent, and Simon Lacoste-Julien. Implicit regularization via neural feature alignment.  
344 (arXiv:2008.00938), 2021.
- 345 [26] Haozhe Shan and Blake Bordelon. A theory of neural tangent kernel alignment and its influence  
346 on training. (arXiv:2105.14301), 2022.
- 347 [27] Abdulkadir Canatar and Cengiz Pehlevan. A kernel analysis of feature learning in deep  
348 neural networks. In *2022 58th Annual Allerton Conference on Communication, Control, and*  
349 *Computing (Allerton)*, pages 1–8. IEEE.
- 350 [28] James P. Sethna. *Statistical mechanics: Entropy, order parameters, and complexity*. Oxford  
351 University Press, 2021.
- 352 [29] Joseph W Goodman. Statistical optics. *New York, Wiley-Interscience, 1985, 567 p.*, 1, 1985.
- 353 [30] Matthew Tancik, Pratul P. Srinivasan, Ben Mildenhall, Sara Fridovich-Keil, Nithin Raghavan,  
354 Utkarsh Singhal, Ravi Ramamoorthi, Jonathan T. Barron, and Ren Ng. Fourier features let  
355 networks learn high frequency functions in low dimensional domains. (arXiv:2006.10739),  
356 2020.
- 357 [31] Filipe de Avila Belbute-Peres and J. Zico Kolter. Simple initialization and parametrization of  
358 sinusoidal networks via their kernel bandwidth, 2022.
- 359 [32] Zhen Liu, Hao Zhu, Qi Zhang, Jingde Fu, Weibing Deng, Zhan Ma, Yanwen Guo, and Xun  
360 Cao. Finer: Flexible spectral-bias tuning in implicit neural representation by variable-periodic  
361 activation functions, 2023.
- 362 [33] John Canny. A computational approach to edge detection. *IEEE Transactions on Pattern*  
363 *Analysis and Machine Intelligence*, PAMI-8(6):679–698, 1986.
- 364 [34] Zheming Li, Hongxia Wang, and Deyu Meng. Regularize implicit neural representation by itself.  
365 In *2023 IEEE/CVF Conference on Computer Vision and Pattern Recognition (CVPR)*, pages  
366 10280–10288. IEEE.
- 367 [35] Gizem Yüce, Guillermo Ortiz-Jiménez, Beril Besbinar, and Pascal Frossard. A structured  
368 dictionary perspective on implicit neural representations. (arXiv:2112.01917), 2022.
- 369 [36] Vishwanath Saragadam, Daniel LeJeune, Jasper Tan, Guha Balakrishnan, Ashok Veeraraghavan,  
370 and Richard G. Baraniuk. WIRE: Wavelet implicit neural representations. (arXiv:2301.05187),  
371 2023.
- 372 [37] Jeremy Vonderfecht and Feng Liu. Predicting the encoding error of sirens, 2024.
- 373 [38] Stanislav Fort, Gintare Karolina Dziugaite, Mansheej Paul, Sepideh Kharaghani, Daniel M. Roy,  
374 and Surya Ganguli. Deep learning versus kernel learning: an empirical study of loss landscape  
375 geometry and the time evolution of the neural tangent kernel. (arXiv:2010.15110), 2020.

- 376 [39] Mario Geiger, Stefano Spigler, Arthur Jacot, and Matthieu Wyart. Disentangling feature and  
377 lazy training in deep neural networks. 2020(11):113301.
- 378 [40] Diederik P. Kingma and Jimmy Ba. Adam: A method for stochastic optimization. *CoRR*,  
379 abs/1412.6980, 2014.
- 380 [41] Stefan Van der Walt, Johannes L Schönberger, Juan Nunez-Iglesias, François Boulogne,  
381 Joshua D Warner, Neil Yager, Emmanuelle Gouillart, and Tony Yu. scikit-image: image  
382 processing in python. *PeerJ*, 2:e453, 2014.
- 383 [42] Jia Deng, Wei Dong, Richard Socher, Li-Jia Li, Kai Li, and Li Fei-Fei. Imagenet: A large-  
384 scale hierarchical image database. In *2009 IEEE conference on computer vision and pattern  
385 recognition*, pages 248–255. Ieee, 2009.
- 386 [43] Adam Paszke, Sam Gross, Francisco Massa, Adam Lerer, James Bradbury, Gregory Chanan,  
387 Trevor Killeen, Zeming Lin, Natalia Gimelshein, Luca Antiga, Alban Desmaison, Andreas  
388 Kopf, Edward Yang, Zachary DeVito, Martin Raison, Alykhan Tejani, Sasank Chilamkurthy,  
389 Benoit Steiner, Lu Fang, Junjie Bai, and Soumith Chintala. Pytorch: An imperative style,  
390 high-performance deep learning library. In *Advances in Neural Information Processing Systems*  
391 32, pages 8024–8035. Curran Associates, Inc., 2019.
- 392 [44] Richard Zou Horace He. functorch: Jax-like composable function transforms for pytorch. 2021.
- 393 [45] Fabian Pedregosa, Gaël Varoquaux, Alexandre Gramfort, Vincent Michel, Bertrand Thirion,  
394 Olivier Grisel, Mathieu Blondel, Peter Prettenhofer, Ron Weiss, Vincent Dubourg, et al. Scikit-  
395 learn: Machine learning in python. *Journal of machine learning research*, 12(Oct):2825–2830,  
396 2011.
- 397 [46] Pauli Virtanen, Ralf Gommers, Travis E. Oliphant, Matt Haberland, Tyler Reddy, David  
398 Cournapeau, Evgeni Burovski, Pearu Peterson, Warren Weckesser, Jonathan Bright, Stéfan J.  
399 van der Walt, Matthew Brett, Joshua Wilson, K. Jarrod Millman, Nikolay Mayorov, Andrew  
400 R. J. Nelson, Eric Jones, Robert Kern, Eric Larson, C J Carey, İlhan Polat, Yu Feng, Eric W.  
401 Moore, Jake VanderPlas, Denis Laxalde, Josef Perktold, Robert Cimrman, Ian Henriksen, E. A.  
402 Quintero, Charles R. Harris, Anne M. Archibald, Antônio H. Ribeiro, Fabian Pedregosa, Paul  
403 van Mulbregt, and SciPy 1.0 Contributors. SciPy 1.0: Fundamental Algorithms for Scientific  
404 Computing in Python. *Nature Methods*, 17:261–272, 2020.
- 405 [47] Ben Mildenhall, Pratul P. Srinivasan, Matthew Tancik, Jonathan T. Barron, Ravi Ramamoorthi,  
406 and Ren Ng. Nerf: Representing scenes as neural radiance fields for view synthesis, 2020.
- 407 [48] C. Harris and M. Stephens. A combined corner and edge detector. In *Proceedings of the Alvey  
408 Vision Conference*, pages 23.1–23.6. Alvey Vision Club, 1988. doi:10.5244/C.2.23.

## NeurIPS Paper Checklist

The checklist is designed to encourage best practices for responsible machine learning research, addressing issues of reproducibility, transparency, research ethics, and societal impact. Do not remove the checklist: **The papers not including the checklist will be desk rejected.** The checklist should follow the references and follow the (optional) supplemental material. The checklist does NOT count towards the page limit.

Please read the checklist guidelines carefully for information on how to answer these questions. For each question in the checklist:

- You should answer [Yes], [No], or [NA].
- [NA] means either that the question is Not Applicable for that particular paper or the relevant information is Not Available.
- Please provide a short (1–2 sentence) justification right after your answer (even for NA).

**The checklist answers are an integral part of your paper submission.** They are visible to the reviewers, area chairs, senior area chairs, and ethics reviewers. You will be asked to also include it (after eventual revisions) with the final version of your paper, and its final version will be published with the paper.

The reviewers of your paper will be asked to use the checklist as one of the factors in their evaluation. While "[Yes]" is generally preferable to "[No]", it is perfectly acceptable to answer "[No]" provided a proper justification is given (e.g., "error bars are not reported because it would be too computationally expensive" or "we were unable to find the license for the dataset we used"). In general, answering "[No]" or "[NA]" is not grounds for rejection. While the questions are phrased in a binary way, we acknowledge that the true answer is often more nuanced, so please just use your best judgment and write a justification to elaborate. All supporting evidence can appear either in the main paper or the supplemental material, provided in appendix. If you answer [Yes] to a question, in the justification please point to the section(s) where related material for the question can be found.

### 1. Claims

Question: Do the main claims made in the abstract and introduction accurately reflect the paper's contributions and scope?

Answer: [Yes]

Justification: Our main claims in the abstract are that (1) we derive a local approximation of the NTK for SIRENs (all of Section 3); (2) we construct order parameters from this approximation, namely, in Section 3.1 for diffusion wavecrests, loss rate collapse (Section 3.4), and NTK alignment (3.3). We discuss SIREN biases in section 4.1 and 4.2 and the Discussion (Section 5). Considering more general deep image regression, we compare against ReLU+PE in Appendix D.

Guidelines:

- The answer NA means that the abstract and introduction do not include the claims made in the paper.
- The abstract and/or introduction should clearly state the claims made, including the contributions made in the paper and important assumptions and limitations. A No or NA answer to this question will not be perceived well by the reviewers.
- The claims made should match theoretical and experimental results, and reflect how much the results can be expected to generalize to other settings.
- It is fine to include aspirational goals as motivation as long as it is clear that these goals are not attained by the paper.

### 2. Limitations

Question: Does the paper discuss the limitations of the work performed by the authors?

Answer: [Yes]

Justification: In addition to the conclusion (which clarifies we only consider full batch GD), we make numerous assumptions outlined in Section 3 that we only know to hold for

SIRENs (which we validate in Appendix F). What’s more, as outlined in the introduction, our analysis is only tractable because we are working in low dimensional domains (ie image regression).

Guidelines:

- The answer NA means that the paper has no limitation while the answer No means that the paper has limitations, but those are not discussed in the paper.
- The authors are encouraged to create a separate "Limitations" section in their paper.
- The paper should point out any strong assumptions and how robust the results are to violations of these assumptions (e.g., independence assumptions, noiseless settings, model well-specification, asymptotic approximations only holding locally). The authors should reflect on how these assumptions might be violated in practice and what the implications would be.
- The authors should reflect on the scope of the claims made, e.g., if the approach was only tested on a few datasets or with a few runs. In general, empirical results often depend on implicit assumptions, which should be articulated.
- The authors should reflect on the factors that influence the performance of the approach. For example, a facial recognition algorithm may perform poorly when image resolution is low or images are taken in low lighting. Or a speech-to-text system might not be used reliably to provide closed captions for online lectures because it fails to handle technical jargon.
- The authors should discuss the computational efficiency of the proposed algorithms and how they scale with dataset size.
- If applicable, the authors should discuss possible limitations of their approach to address problems of privacy and fairness.
- While the authors might fear that complete honesty about limitations might be used by reviewers as grounds for rejection, a worse outcome might be that reviewers discover limitations that aren’t acknowledged in the paper. The authors should use their best judgment and recognize that individual actions in favor of transparency play an important role in developing norms that preserve the integrity of the community. Reviewers will be specifically instructed to not penalize honesty concerning limitations.

### 3. Theory assumptions and proofs

Question: For each theoretical result, does the paper provide the full set of assumptions and a complete (and correct) proof?

Answer: [\[Yes\]](#)

Justification: The main paper, this is all in Section 3. Extra proofs found in Appendix A.

Guidelines:

- The answer NA means that the paper does not include theoretical results.
- All the theorems, formulas, and proofs in the paper should be numbered and cross-referenced.
- All assumptions should be clearly stated or referenced in the statement of any theorems.
- The proofs can either appear in the main paper or the supplemental material, but if they appear in the supplemental material, the authors are encouraged to provide a short proof sketch to provide intuition.
- Inversely, any informal proof provided in the core of the paper should be complemented by formal proofs provided in appendix or supplemental material.
- Theorems and Lemmas that the proof relies upon should be properly referenced.

### 4. Experimental result reproducibility

Question: Does the paper fully disclose all the information needed to reproduce the main experimental results of the paper to the extent that it affects the main claims and/or conclusions of the paper (regardless of whether the code and data are provided or not)?

Answer: [\[Yes\]](#)

Justification: Section 4 begins with a summary of our setup, and Appendix B gives the full details. Our actual experiments are very simple: training a variety of SIREN models and tracking summary statistics of the NTK. The bulk of the paper is derivations.

Guidelines:

- The answer NA means that the paper does not include experiments.
- If the paper includes experiments, a No answer to this question will not be perceived well by the reviewers: Making the paper reproducible is important, regardless of whether the code and data are provided or not.
- If the contribution is a dataset and/or model, the authors should describe the steps taken to make their results reproducible or verifiable.
- Depending on the contribution, reproducibility can be accomplished in various ways. For example, if the contribution is a novel architecture, describing the architecture fully might suffice, or if the contribution is a specific model and empirical evaluation, it may be necessary to either make it possible for others to replicate the model with the same dataset, or provide access to the model. In general, releasing code and data is often one good way to accomplish this, but reproducibility can also be provided via detailed instructions for how to replicate the results, access to a hosted model (e.g., in the case of a large language model), releasing of a model checkpoint, or other means that are appropriate to the research performed.
- While NeurIPS does not require releasing code, the conference does require all submissions to provide some reasonable avenue for reproducibility, which may depend on the nature of the contribution. For example
  - (a) If the contribution is primarily a new algorithm, the paper should make it clear how to reproduce that algorithm.
  - (b) If the contribution is primarily a new model architecture, the paper should describe the architecture clearly and fully.
  - (c) If the contribution is a new model (e.g., a large language model), then there should either be a way to access this model for reproducing the results or a way to reproduce the model (e.g., with an open-source dataset or instructions for how to construct the dataset).
  - (d) We recognize that reproducibility may be tricky in some cases, in which case authors are welcome to describe the particular way they provide for reproducibility. In the case of closed-source models, it may be that access to the model is limited in some way (e.g., to registered users), but it should be possible for other researchers to have some path to reproducing or verifying the results.

## 5. Open access to data and code

Question: Does the paper provide open access to the data and code, with sufficient instructions to faithfully reproduce the main experimental results, as described in supplemental material?

Answer: [Yes]

Justification: We will be releasing code as part of the supplementary materials, namely, our training code, monitoring code, and analysis code.

Guidelines:

- The answer NA means that paper does not include experiments requiring code.
- Please see the NeurIPS code and data submission guidelines (<https://nips.cc/public/guides/CodeSubmissionPolicy>) for more details.
- While we encourage the release of code and data, we understand that this might not be possible, so “No” is an acceptable answer. Papers cannot be rejected simply for not including code, unless this is central to the contribution (e.g., for a new open-source benchmark).
- The instructions should contain the exact command and environment needed to run to reproduce the results. See the NeurIPS code and data submission guidelines (<https://nips.cc/public/guides/CodeSubmissionPolicy>) for more details.
- The authors should provide instructions on data access and preparation, including how to access the raw data, preprocessed data, intermediate data, and generated data, etc.
- The authors should provide scripts to reproduce all experimental results for the new proposed method and baselines. If only a subset of experiments are reproducible, they should state which ones are omitted from the script and why.



- At submission time, to preserve anonymity, the authors should release anonymized versions (if applicable).
- Providing as much information as possible in supplemental material (appended to the paper) is recommended, but including URLs to data and code is permitted.

## 6. Experimental setting/details

Question: Does the paper specify all the training and test details (e.g., data splits, hyperparameters, how they were chosen, type of optimizer, etc.) necessary to understand the results?

Answer: [Yes]

Justification: We search over a range of hyperparameters summarized at the beginning of Section 4, and in detail in Appendix B. This is for exploration, rather than optimization, as this paper is about considering the inductive biases induced by different hyperparameters. Re optimizer we only use full batch GD (described in Section 2) with a small, constant learning rate described in Appendix B.

Guidelines:

- The answer NA means that the paper does not include experiments.
- The experimental setting should be presented in the core of the paper to a level of detail that is necessary to appreciate the results and make sense of them.
- The full details can be provided either with the code, in appendix, or as supplemental material.

## 7. Experiment statistical significance

Question: Does the paper report error bars suitably and correctly defined or other appropriate information about the statistical significance of the experiments?

Answer: [Yes]

Justification: Table 1 summarizes results from across several runs (aggregated across architectures, datasets, and random seeds). The heatmap in Figure 3 is obtain through analysis of the confidence bounds we used to detect phase transitions.

Guidelines:

- The answer NA means that the paper does not include experiments.
- The authors should answer "Yes" if the results are accompanied by error bars, confidence intervals, or statistical significance tests, at least for the experiments that support the main claims of the paper.
- The factors of variability that the error bars are capturing should be clearly stated (for example, train/test split, initialization, random drawing of some parameter, or overall run with given experimental conditions).
- The method for calculating the error bars should be explained (closed form formula, call to a library function, bootstrap, etc.)
- The assumptions made should be given (e.g., Normally distributed errors).
- It should be clear whether the error bar is the standard deviation or the standard error of the mean.
- It is OK to report 1-sigma error bars, but one should state it. The authors should preferably report a 2-sigma error bar than state that they have a 96% CI, if the hypothesis of Normality of errors is not verified.
- For asymmetric distributions, the authors should be careful not to show in tables or figures symmetric error bars that would yield results that are out of range (e.g. negative error rates).
- If error bars are reported in tables or plots, The authors should explain in the text how they were calculated and reference the corresponding figures or tables in the text.

## 8. Experiments compute resources

Question: For each experiment, does the paper provide sufficient information on the computer resources (type of compute workers, memory, time of execution) needed to reproduce the experiments?

Answer: [Yes]

Justification: This is in Appendix B.1.

Guidelines:

- The answer NA means that the paper does not include experiments.
- The paper should indicate the type of compute workers CPU or GPU, internal cluster, or cloud provider, including relevant memory and storage.
- The paper should provide the amount of compute required for each of the individual experimental runs as well as estimate the total compute.
- The paper should disclose whether the full research project required more compute than the experiments reported in the paper (e.g., preliminary or failed experiments that didn't make it into the paper).

## 9. Code of ethics

Question: Does the research conducted in the paper conform, in every respect, with the NeurIPS Code of Ethics <https://neurips.cc/public/EthicsGuidelines?>

Answer: [Yes]

Justification: Our work doesn't involve any human subjects, and is fairly concentrated in its scope to theoretical aspects of learning dynamics in 2D image regression problems. Our research is not of a critical nature, though it can potentially be used to help interpret image regression models, and thus could be the foundation of tools to improve safety.

Guidelines:

- The answer NA means that the authors have not reviewed the NeurIPS Code of Ethics.
- If the authors answer No, they should explain the special circumstances that require a deviation from the Code of Ethics.
- The authors should make sure to preserve anonymity (e.g., if there is a special consideration due to laws or regulations in their jurisdiction).

## 10. Broader impacts

Question: Does the paper discuss both potential positive societal impacts and negative societal impacts of the work performed?

Answer: [NA]

Justification: Our work is of a theoretical nature specialized to very specific models, and we do not believe it has wider societal impact.

Guidelines:

- The answer NA means that there is no societal impact of the work performed.
- If the authors answer NA or No, they should explain why their work has no societal impact or why the paper does not address societal impact.
- Examples of negative societal impacts include potential malicious or unintended uses (e.g., disinformation, generating fake profiles, surveillance), fairness considerations (e.g., deployment of technologies that could make decisions that unfairly impact specific groups), privacy considerations, and security considerations.
- The conference expects that many papers will be foundational research and not tied to particular applications, let alone deployments. However, if there is a direct path to any negative applications, the authors should point it out. For example, it is legitimate to point out that an improvement in the quality of generative models could be used to generate deepfakes for disinformation. On the other hand, it is not needed to point out that a generic algorithm for optimizing neural networks could enable people to train models that generate Deepfakes faster.
- The authors should consider possible harms that could arise when the technology is being used as intended and functioning correctly, harms that could arise when the technology is being used as intended but gives incorrect results, and harms following from (intentional or unintentional) misuse of the technology.

- If there are negative societal impacts, the authors could also discuss possible mitigation strategies (e.g., gated release of models, providing defenses in addition to attacks, mechanisms for monitoring misuse, mechanisms to monitor how a system learns from feedback over time, improving the efficiency and accessibility of ML).

## 11. Safeguards

Question: Does the paper describe safeguards that have been put in place for responsible release of data or models that have a high risk for misuse (e.g., pretrained language models, image generators, or scraped datasets)?

Answer: [NA]

Justification: We do not believe our research warrants this. It is a theoretical investigation on the dynamics of learning in a specific class of image regression models. We do not anticipate that our code or our derivations can be misused.

Guidelines:

- The answer NA means that the paper poses no such risks.
- Released models that have a high risk for misuse or dual-use should be released with necessary safeguards to allow for controlled use of the model, for example by requiring that users adhere to usage guidelines or restrictions to access the model or implementing safety filters.
- Datasets that have been scraped from the Internet could pose safety risks. The authors should describe how they avoided releasing unsafe images.
- We recognize that providing effective safeguards is challenging, and many papers do not require this, but we encourage authors to take this into account and make a best faith effort.

## 12. Licenses for existing assets

Question: Are the creators or original owners of assets (e.g., code, data, models), used in the paper, properly credited and are the license and terms of use explicitly mentioned and properly respected?

Answer: [Yes]

Justification: Appendix B outlines the images used from public datasets, and the means through which we obtained them. We make use of no other assets, beyond pytorch and the scipy ecosystem, which we cite.

Guidelines:

- The answer NA means that the paper does not use existing assets.
- The authors should cite the original paper that produced the code package or dataset.
- The authors should state which version of the asset is used and, if possible, include a URL.
- The name of the license (e.g., CC-BY 4.0) should be included for each asset.
- For scraped data from a particular source (e.g., website), the copyright and terms of service of that source should be provided.
- If assets are released, the license, copyright information, and terms of use in the package should be provided. For popular datasets, [paperswithcode.com/datasets](https://paperswithcode.com/datasets) has curated licenses for some datasets. Their licensing guide can help determine the license of a dataset.
- For existing datasets that are re-packaged, both the original license and the license of the derived asset (if it has changed) should be provided.
- If this information is not available online, the authors are encouraged to reach out to the asset's creators.

## 13. New assets

Question: Are new assets introduced in the paper well documented and is the documentation provided alongside the assets?

Answer: [NA]

Justification: We do not introduce new assets.

Guidelines:

- The answer NA means that the paper does not release new assets.
- Researchers should communicate the details of the dataset/code/model as part of their submissions via structured templates. This includes details about training, license, limitations, etc.
- The paper should discuss whether and how consent was obtained from people whose asset is used.
- At submission time, remember to anonymize your assets (if applicable). You can either create an anonymized URL or include an anonymized zip file.

#### 14. Crowdsourcing and research with human subjects

Question: For crowdsourcing experiments and research with human subjects, does the paper include the full text of instructions given to participants and screenshots, if applicable, as well as details about compensation (if any)?

Answer: [NA]

Justification: We don't do any crowdsourcing or work with human subjects.

Guidelines:

- The answer NA means that the paper does not involve crowdsourcing nor research with human subjects.
- Including this information in the supplemental material is fine, but if the main contribution of the paper involves human subjects, then as much detail as possible should be included in the main paper.
- According to the NeurIPS Code of Ethics, workers involved in data collection, curation, or other labor should be paid at least the minimum wage in the country of the data collector.

#### 15. Institutional review board (IRB) approvals or equivalent for research with human subjects

Question: Does the paper describe potential risks incurred by study participants, whether such risks were disclosed to the subjects, and whether Institutional Review Board (IRB) approvals (or an equivalent approval/review based on the requirements of your country or institution) were obtained?

Answer: [NA]

Justification: There were no study participants.

Guidelines:

- The answer NA means that the paper does not involve crowdsourcing nor research with human subjects.
- Depending on the country in which research is conducted, IRB approval (or equivalent) may be required for any human subjects research. If you obtained IRB approval, you should clearly state this in the paper.
- We recognize that the procedures for this may vary significantly between institutions and locations, and we expect authors to adhere to the NeurIPS Code of Ethics and the guidelines for their institution.
- For initial submissions, do not include any information that would break anonymity (if applicable), such as the institution conducting the review.

#### 16. Declaration of LLM usage

Question: Does the paper describe the usage of LLMs if it is an important, original, or non-standard component of the core methods in this research? Note that if the LLM is used only for writing, editing, or formatting purposes and does not impact the core methodology, scientific rigor, or originality of the research, declaration is not required.

Answer: [NA]

Justification: LLMs are not used in this paper.

Guidelines:

- The answer NA means that the core method development in this research does not involve LLMs as any important, original, or non-standard components.
- Please refer to our LLM policy (<https://neurips.cc/Conferences/2025/LLM>) for what should or should not be described.

## 777 **Supplementary Materials**

|     |                                                                                     |           |
|-----|-------------------------------------------------------------------------------------|-----------|
| 778 | <b>A Deferred Proofs</b>                                                            | <b>21</b> |
| 779 | A.1 Decomposition of the NTK over layers . . . . .                                  | 21        |
| 780 | A.2 Derivation of the Diffusion Equation . . . . .                                  | 22        |
| 781 | A.3 Local Cauchy Approximation of the $C_{NTK}$ . . . . .                           | 23        |
| 782 | A.4 Derivation of the Correlation Lengthscale from the Cauchy Approximation . . . . | 25        |
| 783 | A.5 Minimum Value of $C_{NTK}$ . . . . .                                            | 26        |
| 784 | A.6 Relating Loss Gradient Variance to the NTK . . . . .                            | 27        |
| 785 | <b>B Experimental Details</b>                                                       | <b>27</b> |
| 786 | B.1 Model Training . . . . .                                                        | 27        |
| 787 | B.2 Order Parameter Estimation . . . . .                                            | 28        |
| 788 | <b>C Occurrence Rates of Phase Transitions</b>                                      | <b>29</b> |
| 789 | C.1 Impact of Image Features . . . . .                                              | 29        |
| 790 | C.2 Additional Figures: Impact of Hyperparameters . . . . .                         | 30        |
| 791 | <b>D Comparison with ReLU Activations</b>                                           | <b>31</b> |
| 792 | <b>E Implications of Local Image Structure on Feature Learning</b>                  | <b>33</b> |
| 793 | E.1 On the Relationship Between Structure Tensors and Tangent Kernels . . . . .     | 33        |
| 794 | E.2 MAG-MA: Order Parameters From Translational Symmetry Breaking . . . . .         | 35        |
| 795 | <b>F Evaluating Fidelity of Approximation</b>                                       | <b>35</b> |
| 796 | F.1 Local Structure of the NTK . . . . .                                            | 35        |
| 797 | F.2 Cauchy Approximation . . . . .                                                  | 36        |
| 798 | <b>G Additional Experimental Results</b>                                            | <b>37</b> |
| 799 | G.1 Order Parameter Trajectories for Single Runs . . . . .                          | 37        |
| 800 | G.2 Influence of Hyperparameters on Order Parameter Trajectories . . . . .          | 37        |

## 801 **A Deferred Proofs**

### 802 **A.1 Decomposition of the NTK over layers**

803 Consider a feedforward neural network, denoted by  $f(x) = h_L \circ \dots h_1(x)$ . We furthermore define:

$$z_l = \theta_l^\top h_{l-1} \quad (22)$$

$$h_l = \sigma(z_l) \quad (23)$$

804 In this way, we may calculate the parametric gradients as follows:

$$\nabla_{\theta_l} f = \frac{\partial f}{\partial z_l} h_{l-1}^\top \quad (24)$$

$$\text{vec}(\nabla_{\theta_l} f) = \left( I \otimes \frac{\partial f}{\partial z_l} \right) h_{l-1} \quad (25)$$

$$\text{vec}(\nabla_{\theta_l} f(x_i))^\top \text{vec}(\nabla_{\theta_l} f(x_j)) = h_{l-1}(x_i)^\top \left( I \otimes \frac{\partial f(x_i)}{\partial z_l} \right) \left( I \otimes \frac{\partial f(x_j)}{\partial z_l} \right) h_{l-1}(x_j) \quad (26)$$

$$= h_{l-1}(x_i)^\top \left( I \otimes \frac{\partial f(x_i)}{\partial z_l} \frac{\partial f(x_j)}{\partial z_l} \right) h_{l-1}(x_j) \quad (27)$$

$$= \left( \frac{\partial f(x_i)}{\partial z_l} \frac{\partial f(x_j)}{\partial z_l} \right) \left( h_{l-1}(x_i)^\top h_{l-1}(x_j) \right) \quad (28)$$

805 The first term in this product defines functional similarity between points, while the second defines  
 806 representational similarity. Thinking of each term as a separate kernel, the overall layer kernel - ie  
 807 the product is defined via an AND operation. A similar formula holds for the other layers. The full  
 808 NTK is then given simply by:

$$K(x_i, x_j; \theta) = \sum_{l=1}^L \left( \frac{\partial f(x_i)}{\partial z_l} \frac{\partial f(x_j)}{\partial z_l} \right) \left( h_{l-1}(x_i)^\top h_{l-1}(x_j) \right) \quad (29)$$

$$= \sum_{l=1}^L K_l(x_i, x_j) \quad (30)$$

809 In particular, we have:

$$K(x, x; \theta) = \sum_{l=1}^L \left\| \frac{\partial f(x)}{\partial z_l} \right\|_2^2 \left\| h_{l-1}(x) \right\|_2^2 \quad (31)$$

810 Following the same logic, the full NTK is defined as an OR over all the layers. For INRs, these layers  
 811 tend to be frequency separated, so that lower layers correspond to lower frequencies.

## 812 A.2 Derivation of the Diffusion Equation

813 The motivation for our ansatz in equation 8 is the empirical form of the correlation function in  
 814 equation 32. Written fully, we have:

$$K(x, x+u) \approx \|\nabla_{\theta} f(x)\|^2 \exp(-\|u\|^2/\xi^2(x)) + \|\nabla_{\theta} f(x)\|^2 c_{\infty}(x) \quad (32)$$

815 Thus the residuals evolve according to:

$$\dot{r}(x) = - \int du r(x+u) K(x, x+u) \quad (33)$$

$$\approx -\|\nabla_{\theta} f(x)\|^2 \left[ \int du \exp(-\|u\|^2/\xi^2(x)) r(x+u) - c_{\infty}(x) \int du r(x+u) \right] \quad (34)$$

$$= \|\nabla_{\theta} f(x)\|^2 \left[ \int du \exp(-\|u\|^2/\xi^2(x)) r(x+u) - \mu_r c_{\infty}(x) \text{Vol}(\mathcal{D}) \right] \quad (35)$$

816 When  $\mu_r \equiv \mathbb{E}[r]$  and  $c_{\infty}$  decay to zero, the second, background term in the above equation becomes  
 817 dominated by local interactions. Thus, in Section 4, we will track the following order parameter:

$$\mu_r K_{\infty} \equiv |\mathbb{E}_x[r] \mathbb{E}_x[\|\nabla_{\theta} f(x)\|^2 c_{\infty}(x)]| \quad (36)$$

818 The order parameter is large in the Drift phase, and small in the Diffusion phase. In Section B, we  
 819 overview the specifics of how we detect changes in the phase. For the remainder of this section, we  
 820 analytically study kernels of the form:

$$K(x, x+u) = A(x) e^{-u^2/2\xi^2(x)} \quad (37)$$

$$= 2\pi \xi^2(x) A(x) \mathcal{N}(u; 0, \xi^2(x) I) \quad (38)$$



821 That is, kernels without a background term. Here,  $\mathcal{N}(u; \mu, \Sigma)$  denotes the  $d$ -dimensional; multivariate  
 822 Gaussian Distribution:

$$\mathcal{N}(u; \mu(x), \Sigma(x)) = \frac{1}{\sqrt{(2\pi)^d \det \Sigma(x)}} \exp \left( -\frac{1}{2} (u - \mu(x))^\top \Sigma^{-1}(x) (u - \mu(x)) \right) \quad (39)$$

823 For our case,  $d = 2$ , and  $\Sigma(x) = \xi^2(x)I$ . The determinant of the covariance is as follows:

$$\det \Sigma(x) = (\xi^2)^2 \det I = \xi^4(x) \quad (40)$$

824 We now consider the integral of the following quadratic form:

$$\int du (u^\top H u) e^{-u^2/2\xi^2(x)} = 2\pi\xi^2(x) \int du (u^\top H u) \mathcal{N}(u; 0, \xi^2(x)I) \quad (41)$$

$$= 2\pi\xi^2(x) \mathbb{E}_{\mathcal{N}(u; 0, \xi^2 I)} [u^\top H u] \quad (42)$$

$$= 2\pi\xi^2(x) \text{tr}(H \Sigma(x)) \quad (43)$$

$$= 2\pi\xi^4(x) \text{tr}(H) \quad (44)$$

825 Now, let's look at the following Taylor expansion:

$$r(x + u) \approx r(x) + u^\top \nabla_x r + \frac{1}{2} u^\top (\nabla_x^2 r) u \quad (45)$$

826 When integrating the above in equation 3, the second term vanishes, because it involves a product of  
 827 symmetric and anti-symmetric functions. Thus, we have

$$\int du r(x + u) K(x, x + u) = A(x) \int du r(x + u) e^{-u^2/2\xi^2(x)} \quad (46)$$

$$= A(x) \int du \left[ r(x) e^{-u^2/2\xi^2(x)} + \frac{1}{2} u^\top (\nabla_x^2 r) u e^{-u^2/2\xi^2(x)} \right] \quad (47)$$

828 Leveraging our result for the quadratic term, we have, finally:

$$\int du r(x + u) K(x, x + u) = 2\pi\xi^2(x) A(x) r(x) + \pi\xi^4(x) A(x) \text{tr}(\nabla_x^2 r) \quad (48)$$

$$= 2\pi\xi^2(x) A(x) r(x) + \pi\xi^4(x) A(x) \Delta^2 r \quad (49)$$

Thus, the diffusion equation becomes:

$$\dot{r} = -2\pi\xi^2(x) A(x) r(x) - \pi\xi^4(x) A(x) \Delta^2 r$$

### 829 **A.3 Local Cauchy Approximation of the $C_{NTK}$**

#### 830 **A.3.1 Notation and Derivation**

831 We consider an arbitrary vector valued function  $f(x)$ , and consider the cosine of the angle between  
 832  $f(x)$  and  $f(x + u)$  for small displacements  $u$ . To ease notation, let us make use of the following  
 833 shorthands:

$$a = f(x) \quad (50)$$

$$b = f(x + u) \quad (51)$$

$$c = b - a \quad (52)$$

$$J = \nabla_x a \quad (53)$$

$$D = \nabla_x ||a||^2 \quad (54)$$

834 To first order in  $u$ , we have:

$$b \approx a + u^\top J \quad (55)$$

$$c \approx u^\top J \quad (56)$$

$$||b||^2 \approx ||a + u^\top J||^2 \quad (57)$$

$$= ||a||^2 + u^\top D + ||u^\top J||^2 \quad (58)$$

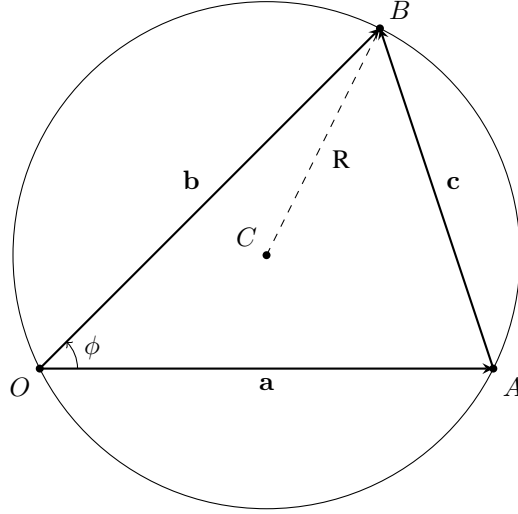

Figure 5: Triangle with vectors  $\mathbf{a}$ ,  $\mathbf{b}$ , and  $\mathbf{b} - \mathbf{a}$ , inscribed in a circumcircle.

Our goal is to discern the local behaviour of the cosine of the angle  $\theta$  between  $a$  and  $b$  (as illustrated in Figure 5). To that end, our starting point is the law of cosines:

$$\cos \phi = \frac{\|a\|^2 + \|b\|^2 - \|c\|^2}{2\|a\|\|b\|} \quad (59)$$

$$\approx \frac{2\|a\|^2 + u^\top D}{2\|a\|^2} \left( 1 + \frac{u^\top D}{\|a\|^2} + \frac{\|u^\top J\|^2}{\|a\|^2} \right)^{-\frac{1}{2}} \quad (60)$$

To proceed, note that, for small scalar  $\epsilon$ , we have the following identity:

$$(1 + \epsilon)^{\frac{1}{2}} \approx 1 + \frac{\epsilon}{2} - \frac{\epsilon^2}{8} \quad (61)$$

Thus:

$$\cos \phi \approx \frac{2\|a\|^2 + u^\top D}{2\|a\|^2 + u^\top D + \|u^\top J\|^2 - \frac{1}{16\|a\|^2}(u^\top D)^2} \quad (62)$$

$$(63)$$

For the NTK, where we will have  $a = \nabla_\theta f$ ,  $\|a\|$  is so large that we may ignore the term of order  $\|a\|^{-2}$ . We illustrate our approximation in Figure 6.

### A.3.2 Specialization for Feed Forward Neural Networks

We want to consider the case where, per our previous derivation,  $a = \nabla_\theta f$ . This procedure is straightforward for the biases. For the weights  $W_{ij}^{(l)}$ , we have:

$$\frac{\partial f(x; \theta)}{\partial W_{ij}^{(l)}} = \frac{\partial f(x; \theta)}{\partial z_i^{(l)}} h_j^{(l-1)}(x; \theta) \quad (64)$$

Therefore:

$$\frac{\partial f^2(x; \theta)}{\partial x_m \partial W_{ij}^{(l)}} = \frac{\partial^2 f(x; \theta)}{\partial x_m \partial z_i^{(l)}} h_j^{(l-1)}(x; \theta) + \frac{\partial f(x; \theta)}{\partial z_i^{(l)}} \frac{\partial h_j^{(l-1)}(x; \theta)}{\partial x_m} \quad (65)$$

$$\triangleq (J_z^{(l)})_{im} h_j^{(l-1)} + (J_h^{(l-1)})_{jm} \partial_{z_i^{(l)}} f \quad (66)$$

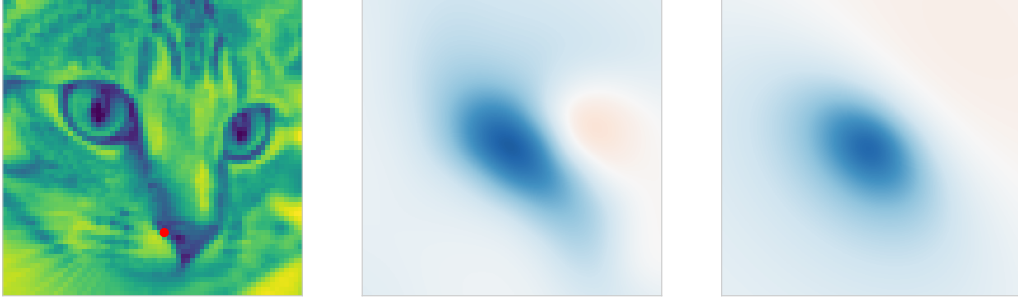

Figure 6: **Cauchy Approximation of the Cosine NTK.** Left: Sample image, and test point  $x = A$ . Middle: visualization of  $C_{NTK}(x, x + u)$  in the vicinity of the point  $A$  for small separations  $u$ . Right: the Cauchy approximation, capturing both the range, orientation, and the local minima of the true  $C_{NTK}$ .

845 Before proceeding, let us note that the following holds:

$$\sum_i (J_z^{(l)})_{im} (\partial_{z_i^{(l)}} f) = \frac{1}{2} \partial_{x_m} \|\nabla_{z^{(l)}} f\|^2 \quad (67)$$

$$\sum_i (J_h^{(l)})_{im} h_i^{(l)} = \frac{1}{2} \partial_{x_m} \|h^{(l)}\|^2 \quad (68)$$

846 The covariance matrix in our Gaussian approximation is thus given by:

$$H_W^{(l)} = \sum_{i,j} \frac{\partial f^2}{\partial x_m \partial W_{ij}^{(l)}} \frac{\partial f^2}{\partial x_n \partial W_{ij}^{(l)}} \quad (69)$$

$$= \sum_{i,j} (h_j^{(l-1)})^2 (J_z^{(l)})_{im} (J_z^{(l)})_{in} + (\partial_{z_i^{(l)}} f)^2 (J_h^{(l-1)})_{jm} (J_h^{(l-1)})_{jn} \quad (70)$$

$$\begin{aligned} &+ (J_z^{(l)})_{im} (\partial_{z_i^{(l)}} f) (J_h^{(l-1)})_{jn} h_j^{(l-1)} + (J_z^{(l)})_{in} (\partial_{z_i^{(l)}} f) (J_h^{(l-1)})_{jm} h_j^{(l-1)} \\ &= \|h^{(l-1)}\|^2 J_z^{(l)} J_z^{(l)\top} + \|\nabla_{z^{(l)}} f\|^2 J_h^{(l-1)} (J_h^{(l-1)})^\top \\ &\quad + \frac{1}{4} \nabla_x \|h^{(l-1)}\|^2 \otimes \nabla_x \|\nabla_{z^{(l)}} f\|^2 + \frac{1}{4} \nabla_x \|\nabla_{z^{(l)}} f\|^2 \otimes \nabla_x \|h^{(l-1)}\|^2 \end{aligned} \quad (71)$$

847 The contribution from the bias is comparatively simple:

$$H_b = J_z J_z^\top \quad (72)$$

#### 848 **A.4 Derivation of the Correlation Lengthscale from the Cauchy Approximation**

849 To determine the level sets of the Cauchy Approximation, we must solve:

$$C_{NTK}(x, x + u) = \frac{2a_x^2 + u^\top D_x}{2a_x^2 + u_x^\top D + u^\top H_x u} = c \quad (73)$$

850 Rearranging, and collecting terms, we have:

$$2a_x^2 + u^\top D_x - c(2a_x^2 + u_x^\top D + u^\top H_x u) = 0 \quad (74)$$

$$\Rightarrow 2(1-c)a_x^2 - c\left(-\frac{1-c}{c}u^\top D_x + u^\top H_x u\right) = 0 \quad (75)$$

$$\Rightarrow u^\top H_x u - \frac{1-c}{c}u^\top D_x = \frac{2(1-c)}{c}a_x^2 \quad (76)$$

$$\Rightarrow \left(u - \frac{1-c}{2c}H^{-1}D\right)^\top H \left(u - \frac{1-c}{2c}H^{-1}D\right) - \frac{(1-c)^2}{4c^2}D^\top H^{-1}D = \frac{2(1-c)}{c}a_x^2 \quad (77)$$

$$\Rightarrow \frac{\left(u - \frac{1-c}{2c}H^{-1}D\right)^\top H \left(u - \frac{1-c}{2c}H^{-1}D\right)}{\frac{2(1-c)}{c}a_x^2 + \frac{(1-c)^2}{4c^2}D^\top H^{-1}D} = 1 \quad (78)$$

851 This is the equation of an ellipse centred at  $u = \frac{1-c}{2c}H^{-1}D$ , and with shape matrix:

$$\Sigma_{shape} = \frac{H}{\frac{2(1-c)}{c}a_x^2 + \frac{(1-c)^2}{4c^2}D^\top H^{-1}D} \quad (79)$$

852 The area of this ellipse is (noting that  $H$  is a 2x2 matrix):

$$A_{ellipse} = \frac{\pi}{\sqrt{\det \Sigma_{shape}}} \quad (80)$$

$$= \frac{1}{\sqrt{\det H}} \left( \frac{2(1-c)}{c}a_x^2 + \frac{(1-c)^2}{4c^2}D^\top H^{-1}D \right) \quad (81)$$

853 The correlation lengthscale is then obtained from:

$$\xi = \sqrt{A_{ellipse}/\pi} \quad (82)$$

## 854 A.5 Minimum Value of $C_{NTK}$

855 We consider minimizing the following function:

$$f(u) = \frac{Q(u)}{P(u)} \quad (83)$$

$$Q(u) = 2a^2 + u^\top D \quad (84)$$

$$P(u) = Q(u) + u^\top H u \quad (85)$$

856 Here,  $H$  is non-degenerate and positive definite. Thus:

$$\frac{\partial f}{\partial u} = \frac{\partial_u Q P - Q \partial_u P}{P^2} = 0 \quad (86)$$

$$\Rightarrow \partial_u Q P = Q \partial_u P \quad (87)$$

857 Thus:

$$(u^\top H u) D = (4a^2 + 2u^\top D) H u \quad (88)$$

858 Clearly  $u = 0$  is a solution, and knowing that our expression locally approximates the cosine, we  
859 expect this to be a maximum. To find the other solution, which will be a minima, we take the dot  
860 product of both sides of the above equation with  $u$ . After simplifying, we obtain:

$$u^\top D = -4a^2 \quad (89)$$

861 If we insert this into equation 88, we get:

$$(u^\top H u) D = -4a^2 H u \quad (90)$$

$$\Rightarrow (u^\top H u) H^{-1} D = -4a^2 u \quad (91)$$

$$\Rightarrow (u^\top H u) (D^\top H^{-1} D) = 16a^4 \quad (92)$$

$$\Rightarrow u^\top H u = \frac{16a^4}{D^\top H^{-1} D} \quad (93)$$

862 Armed with an expression for  $u^\top D$  and  $u^\top H u$ , we derive the following formula for the min:

$$f_{min} = \frac{2a^2 + u^\top D}{2a^2 + u^\top D + u^\top H u} \Big|_{u=\arg\min f} \quad (94)$$

$$= \frac{2a^2 - 4a^2}{2a^2 - 4a^2 + \frac{16a^4}{DH^{-1}D}} \quad (95)$$

$$= \frac{DH^{-1}D}{DH^{-1}D - 8a^2} \quad (96)$$

## 863 A.6 Relating Loss Gradient Variance to the NTK

864 Our goal is to quantify the amount of noise in the gradients of the local loss  $\mathcal{L}(x_i) = \frac{1}{2}r(x_i; \theta)^2$ . We  
865 have, in terms of the Jacobian  $J_{ip} = \partial_{\theta_p} f(x_i)$ , the following sample matrix for the gradients:

$$G = RJ \quad (97)$$

866 Here we have defined:

$$R = \text{diag}(r) \quad (98)$$

867 For a dataset with  $N$  samples, the sample mean and covariance are given by:

$$\mu = \frac{1}{N} G^\top \mathbf{1}_N \quad (99)$$

$$= \frac{1}{N} J^\top r \quad (100)$$

$$C = \frac{1}{N} J^\top R^2 J - \mu \mu^\top \quad (101)$$

868 From the cycle property of the trace, we have:

$$\text{tr}(J^\top R^2 J) = \text{tr}(R^2 J J^\top) \quad (102)$$

$$= \text{tr}(R^2 K_{NTK}). \quad (103)$$

869 We also have:

$$\text{Tr}(\mu \mu^\top) = \|\mu\|^2 \quad (104)$$

$$= \frac{1}{N^2} r^\top J J^\top r \quad (105)$$

$$= \frac{1}{N^2} r^\top K_{NTK} r \quad (106)$$

870 Thus the variance of the loss gradients is given by:

$$\sigma_\theta^2 = \frac{1}{N} \text{Tr}(R^2 K_{NTK}) - \frac{1}{N^2} r^\top K_{NTK} r \quad (107)$$

871

## 872 B Experimental Details

### 873 B.1 Model Training

874 All our SIREN models are trained on the images shown in Figure 7, which we obtain through the  
875 python package scikit-image [41], and the ImageNet dataset [42]. These images are down-sampled to  
876 a resolution of  $64 \times 64$  for training, but as a validation task, we track the reconstruction error on the  
877 images downsampled to  $256 \times 256$  resolution. Our SIREN models are implemented using Pytorch  
878 [43], and trained using NVIDIA RTX A6000 48GB GPUs for 10000 epochs, using full batch gradient  
879 descent with a learning rate of 1e-3. In our experimental sweeps, we consider the following ranges:

- 880 • Random seeds from interval  $[0, 5]$ .
- 881 • Width from set  $\{64, 128\}$ .
- 882 • Depth from set  $\{3, 4, 5\}$ .
- 883 •  $\omega_0$  from set  $\{15, 30, 60, 90\}$ .

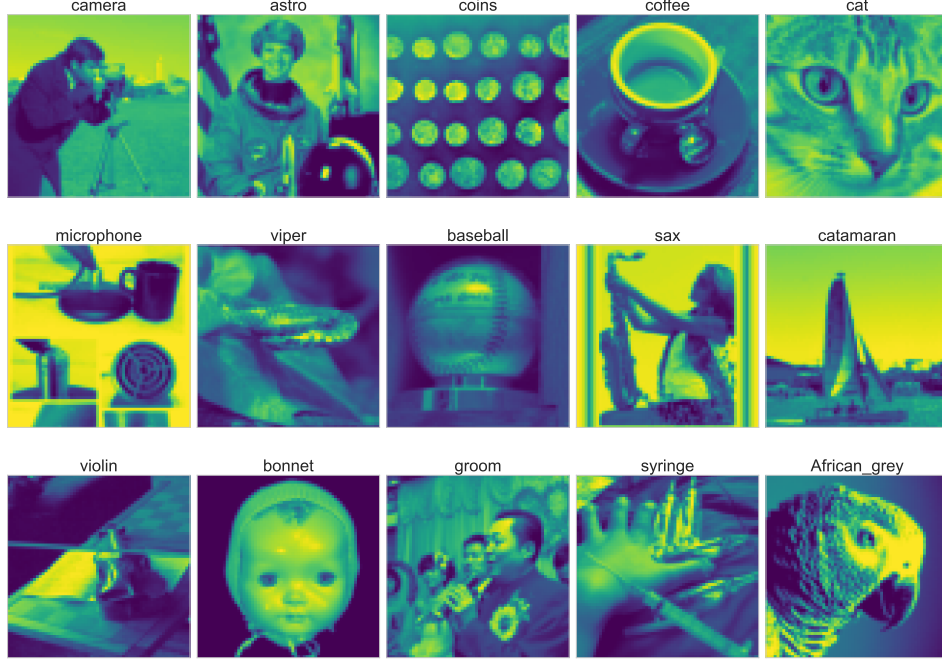

Figure 7: Fifteen of the thirty images used for training INRs

## B.2 Order Parameter Estimation

**Analytical Order Parameters:** To compute the NTK, we use a manual implementation of backpropagation to compute the gradients  $\nabla_{z^{(l)}} f(x)$  for each layer, along with the hidden activations  $h^{(l)}(x)$ . The NTK is then constructed efficiently using the decomposition across layers outlined in Section A.1. To evaluate the local structure components  $a$  and  $D$  defined in equations ?? and ??, we obtain the spatial gradients using functorch [44]. We also assemble the  $H$  defined in equation ?? in this way, except we leverage the decomposition outlined in Section A.3.2 to streamline this process, and occupy less memory.

**Empirical Order Parameters:** Below we describe the estimation procedure for each of the empirical order parameters.

- To estimate the correlation functions empirically, we group pairs of datapoints into 50 bins based on a uniform division of the range of distances. Based on the coordinate range, the minimum distance is 0, and the maximum distance is  $2\sqrt{2}$ . Within each bin, we evaluate the mean of the  $C_{NTK}$ , defining  $c(\epsilon)$ . Based on these groups, we estimate our order parameters as follows:
  - To estimate the asymptotic value  $c_\infty$ , we compute the mean value of  $c(\epsilon)$  over the last ten bins (corresponding to points with the furthest separation).
  - Given the asymptotic value, we rescale all  $c(\epsilon) \rightarrow \tilde{c}(\epsilon) = \frac{c(\epsilon)}{1-c_\infty}$ , and then use linear interpolation to find the value of  $\epsilon$  for which  $\tilde{c}(\epsilon) = 0.5$ , the FWHM. We then have  $\xi_{corr} = \frac{FWHM}{\sqrt{2} \ln 2}$ .
- As an additional measure of the correlation length-scale (which we will use in Appendix D), we may calculate the number of points  $N_C$  for which  $C_{NTK}$  is greater than some cutoff (we use  $\frac{1}{2}(1 + c_\infty)$ ). The effective correlation length-scale is then given by  $\sqrt{N_C dA/\pi}$ , where  $dA$  is the area of the coordinate grid cells. We denote this estimate  $\xi_{FWHM}$ .
- To estimate  $AUC(v_0, \nabla I)$ , the ground truth edges are identified using the Canny Edge Detector distributed through scikit-image [41]. We then evaluate the Area Under the Receiver Operating Characteristic Curve (ROC AUC) using the implementation in scikit-learn [45]. The principal eigenvector  $v_0$ , and the principal eigenvalue  $\lambda_0$ , are both computed

using our own implementation of the Randomized Singular Value Decomposition built with pytorch [43], using 3 iterations and 10 oversamples.

- To evaluate the Centred Kernel Alignment, in order to prevent zero modes from obscuring alignment, the following centred-variant of the normalized Hilbert-Schmidt Information Criterion (HSIC) is employed:

$$\text{CKA}(K, K') = \frac{\text{Tr}(K_c K'_c)}{\sqrt{\text{Tr}(K_c K_c) \text{Tr}(K'_c K'_c)}} \quad (108)$$

Here,  $K_c$  denotes that a centring operation has been applied, and is defined as:

$$K_c = (I - \frac{1}{n} \mathbf{1}\mathbf{1}^\top) K (I - \frac{1}{n} \mathbf{1}\mathbf{1}^\top) \quad (109)$$

For both  $K_X$  and  $K_Y$ , we use bandwidths  $\kappa = 0.1$ .

- To determine the residual correlations in Table 1, we randomly sample (and flatten) 15000  $15 \times 15$  patches from the validation residuals, and compute the pearson correlation matrix. We then record the mean correlation between all pixels in the patch and the patch centre.

## Identifying Critical Points:

- For the gradient variance  $\sigma_\theta^2$ , the loss rate  $\dot{L}_{\text{eval}}$ , and the background contribution  $\mu_r K_\infty$  the location, and confidence region, for the critical points are identified using the peak detection algorithm distributed through scipy.signal [46]. For the gradient variance, we filter for peaks with a prominence of 0.2, loss rate we use 0.4, and for the background we use 0.2. In the case where multiple peaks are found, we select the peaks which appear closest in time. Finally, for  $\mu_r K_\infty$ , the phase transition occurs not at the peak itself, but after the signal decays to zero. Thus we use as confidence region the interval between the identified peak and the right-most boundary.
- For the  $\min C_{NTK}$ , we linearly interpolate to find the time  $t$  where  $\min C_{NTK}$  crosses 0. To compute the confidence interval, we also track the cumulative std of  $\min C_{NTK}$ , denoted  $\epsilon(t)$ . We then use the same linear interpolation strategy to find the times where  $\min C_{NTK} = \epsilon(t)$  and  $\min C_{NTK} = -\epsilon(t)$ .
- For all other parameters, we fit a sigmoid using the curve fitting function from scipy.optimize, with the default settings. The curve we fit has the form:

$$f(x; A, B, \mu, w) = A + (B - A) \left( 1 + e^{-(x-\mu)/w} \right)^{-1} \quad (110)$$

We identify the time  $t = \mu$  with the critical point, with confidence region defined by  $\mu \pm 2w$ . For MAG-MA, where the goal is to detect deviation from zero, we fit this sigmoid to the cumulative STD.

## C Occurrence Rates of Phase Transitions

### C.1 Impact of Image Features

There are three main cases in which a critical point cannot be reliably identified in an order parameter trajectory:

1. Peaks in the gradient variance  $\sigma_\theta$  may be absent, or not prominent enough, to be detected using a standard peak detector.
2. A zero-crossing cannot be found for the  $\min C_{NTK}$  because, at initialization, it is already less than 0.
3. The order parameters do not saturate, and thus, are poorly represented as sigmoids. This is really only a problem for the edge alignment  $\text{AUC}(v_0, \nabla I)$  and the task alignment  $\text{CKA}(K_Y, K_{NTK})$ . In the latter case, in some trials we see CKA steadily decrease after the inflection point of the loss. Numerically, we omit runs where the mean squared error of the fitted sigmoid is greater than 0.01.



Table 2: **Proportion of runs with errors:** Frequency at which runs were omitted in constructing Figure 3, as a function of depth and bandwidth  $\omega_9$ .

| depth | $\omega_0$ | $\text{AUC}(v_0, \nabla I)$ | $\text{CKA}(K_Y, K_{NTK})$ | $\sigma_\theta$ | $\min C_{NTK}$ |
|-------|------------|-----------------------------|----------------------------|-----------------|----------------|
| 3     | 90         | 0.570                       | 0.293                      | 0.007           | 1.000          |
| 3     | 60         | 0.447                       | 0.177                      | 0.023           | 1.000          |
| 3     | 30         | 0.503                       | 0.157                      | 0.093           | 0.700          |
| 3     | 15         | 0.643                       | 0.773                      | 0.583           | 0.600          |
| 4     | 90         | 0.117                       | 0.067                      | 0.000           | 0.500          |
| 4     | 60         | 0.067                       | 0.013                      | 0.000           | 0.500          |
| 4     | 30         | 0.043                       | 0.057                      | 0.037           | 0.500          |
| 4     | 15         | 0.257                       | 0.693                      | 0.170           | 0.343          |
| 5     | 90         | 0.017                       | 0.017                      | 0.000           | 0.470          |
| 5     | 60         | 0.037                       | 0.003                      | 0.000           | 0.203          |
| 5     | 30         | 0.033                       | 0.060                      | 0.000           | 0.083          |
| 5     | 15         | 0.070                       | 0.643                      | 0.070           | 0.093          |

The occurrence rates, as a function of the hyperparameters used, are shown in Table 2. It is important to note, phase transitions may still occur even during these failure modes - the shift in the order parameter may be simply too weak<sup>4</sup> to be identified by the change detection algorithm outlined in Section B.2. It is for this reason that we employ multiple order parameters to identify the same transition (ex the  $\min C_{NTK}$  and the gradient variance  $\sigma_\theta$ ). Nevertheless, it is instructive to identify what properties of image datasets may be used to predict the aforementioned failure modes. To this end, for each experimental run, we determine if any of the previously mentioned failure modes has occurred, and then record the frequency of success for each image studied. In Figure 8, we see that these frequencies correlate with the complexity of the image, as measured the variance of the spatial gradient magnitudes  $\|\nabla_x I\|$ . Namely, we see that more complex images result in sharper peaks of the parameter gradient variance  $\sigma_\theta$ , but collapse of the kernel alignment as measured by  $\text{CKA}(K_Y, K_{NTK})$ . This is reflected in their strong negative/positive spearman correlations. These same properties correlate strongly with the best model performance achieved across all hyperparams (Figure ??). These correlations give additional support to the mechanism described in Section 3.3, whereby SIREN models struggle to fit edges as they have sharp gradients. Finally, we note that the image complexity seems to have little impact on the error rates for the edge alignment  $\text{AUC}(v_0, \nabla I)$  (spearman correlation -0.017) and the minimum value of the  $C_{NTK}$  (spearman correlation -0.1320). By contrast, these parameters are more sensitive to the model architecture.

## C.2 Additional Figures: Impact of Hyperparameters

The broad effects of varying depth and  $\omega_0$  on  $\text{AUC}(v_0, \nabla I)$  are summarized in Table 1. To gain deeper insight into how these parameters influence the principal eigenvector, we examine the two case studies illustrated in Figures 10-11. A lower  $\omega_0$ , by broadening the correlation lengthscale, inducing a smoothing effect, retaining only the sharpest edges. Increasing depth also removes noise.

<sup>4</sup>Also note, even when  $\text{AUC}(v_0, \nabla I)$  is weak, edges are still visible in the principal eigenvector, as seen in Figure 9

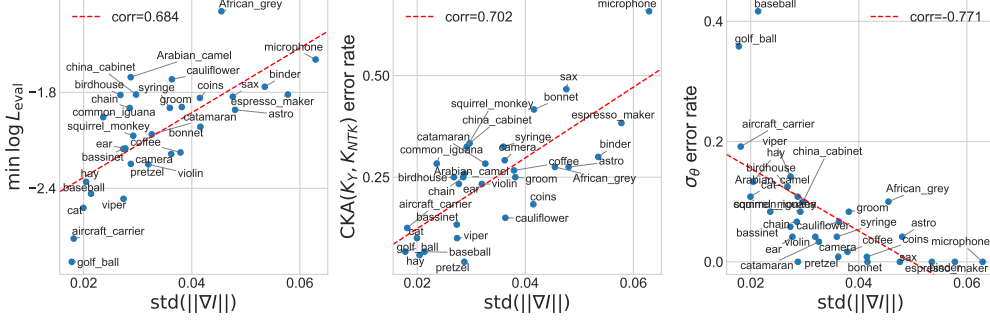

Figure 8: **Image Complexity Affects Detection of Phase Transitions.** We measure the image complexity according the standard deviation of the magnitude of the spatial gradients ( $||\nabla_x I||$ ). Dashed red line indicates line of best fit. Legend records spearman correlation. Left: higher complexity images are positively correlated with higher losses (and therefore, worse performance). Middle: higher complexity images do not saturate the target kernel alignment, causing errors in our sigmoidal fits. Right: higher complexity images lead to sharper peaks in the paramter gradient variance, making their identification easier.

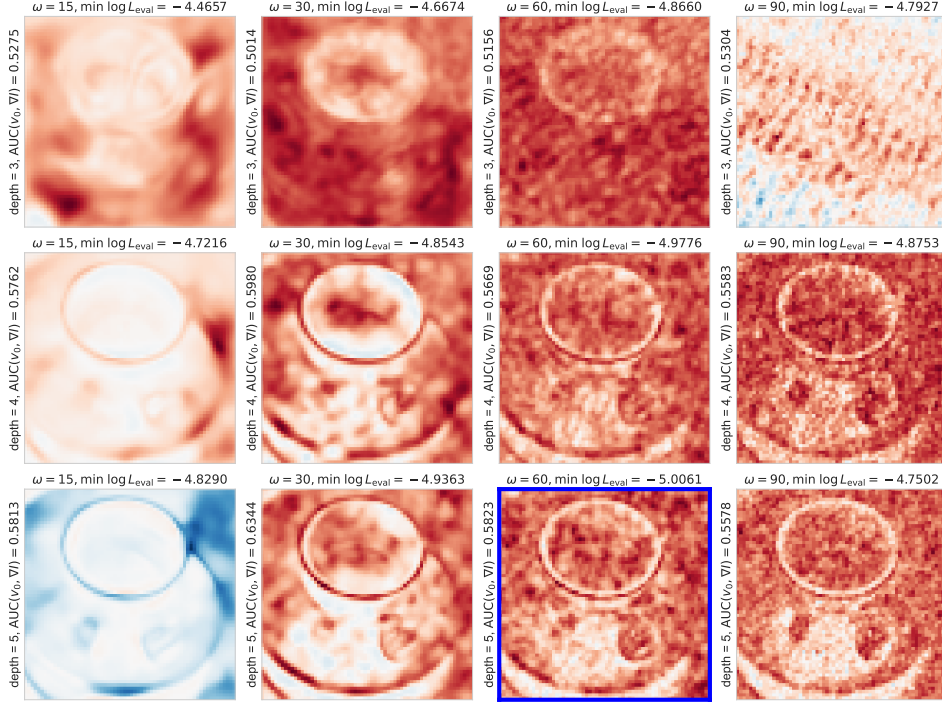

Figure 9: **Variation in NTK Alinment with Hyperparameters (coffee).** Principle eigenvectors of the NTK at the end of training. Best performing architecture highlighted in blue.

## 976 D Comparison with ReLU Activations

977 To justify our focus on sinusoidal neural networks, in this section we examine the learning dynamics  
 978 of ReLU-MLPs, based on the positional encoding scheme used in [47]. The positional encoding  
 979 layer is kept static, and we pre-compute the nyquist frequencies corresponding to our image size  
 980 ( $64 \times 64$ ), as is done in [23]. We denote this architecture ReLU-PE. All other architectural choices  
 981 are identical to those described in Appendix B. We observe a number of differences between SIRENs  
 982 and ReLU-PEs (visualized in Figure 13):

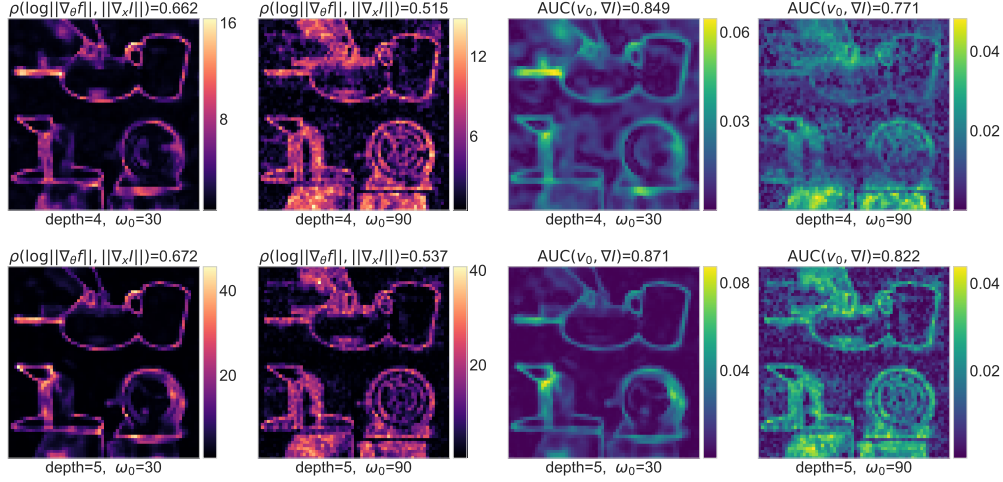

Figure 10: **Effect of Hyperparameters on Edge Alignment:** Reproduction of Figure 4 for the microphone dataset

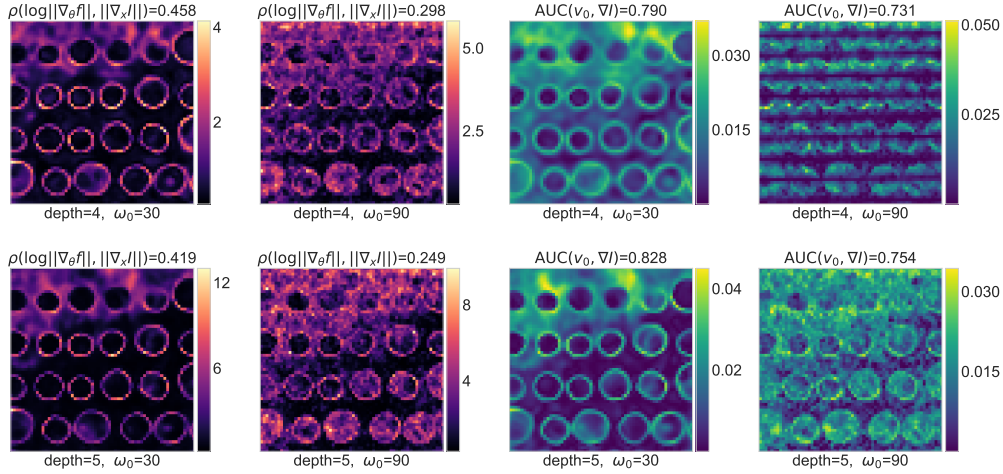

Figure 11: **Effect of Hyperparameters on Edge Alignment:** Reproduction of Figure 4 for the coins dataset

- Firstly, SIREN models exhibit strong locality: over the course of training, the asymptotic value of the  $C_{NTK}$  decays to 0, whereas it grows in ReLU-PE models. What's more, the range of interaction as measured by  $\xi_{FWHM}$  is larger in ReLU-PE models. An example comparing the correlation functions for both architectures is shown in Figure 12.
- Secondly, learning is much slower in ReLU-PE models than it is in SIRENs. One explanation for this is that there is more gradient confusion [11], that is, the minimum value of the  $C_{NTK}$  is lower. In particular,  $\min C_{NTK}$  is less than zero across all ReLU-PE runs, so that these models are always operating in the "slow" phase of learning.
- The principal eigenvalue  $\lambda_0$  of the NTK grows to be orders of magnitude larger for SIREN models than for ReLU-PE models. That said, tangent kernel alignment still occurs in ReLU-PE models, it is just a much slower process. In Figure 14, we train a 7-layer deep, 128-unit wide MLP full-batch with a learning rate of  $1e-3$  for 250k epochs, varying only the activation function. To reach the edge-alignment achieved by a SIREN model after 453 epochs, the ReLU-PE model must train for 239986 epochs. We also see that more of the edges are present in the principal eigenvector of the SIREN model's NTK.

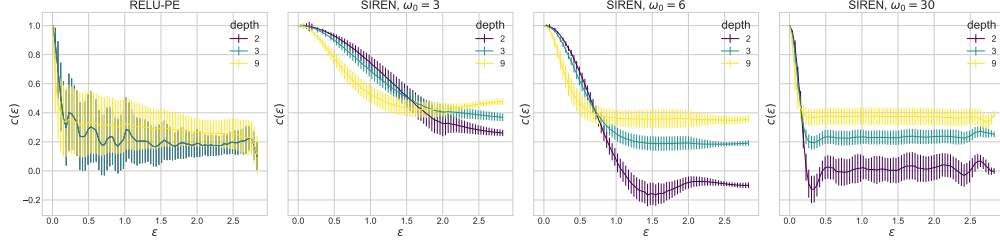

Figure 12: **Effect of Hyperparameters on Correlation Functions At Initialization:** In ReLU-PE models, the Gaussian approximation of the  $C_{NTK}$  correlation function is poor for all depths, due to high-variance, long range interactions. By contrast, for SIREN models, there is much less variance, and the range of the interactions shrinks for increasing  $\omega_0$ .

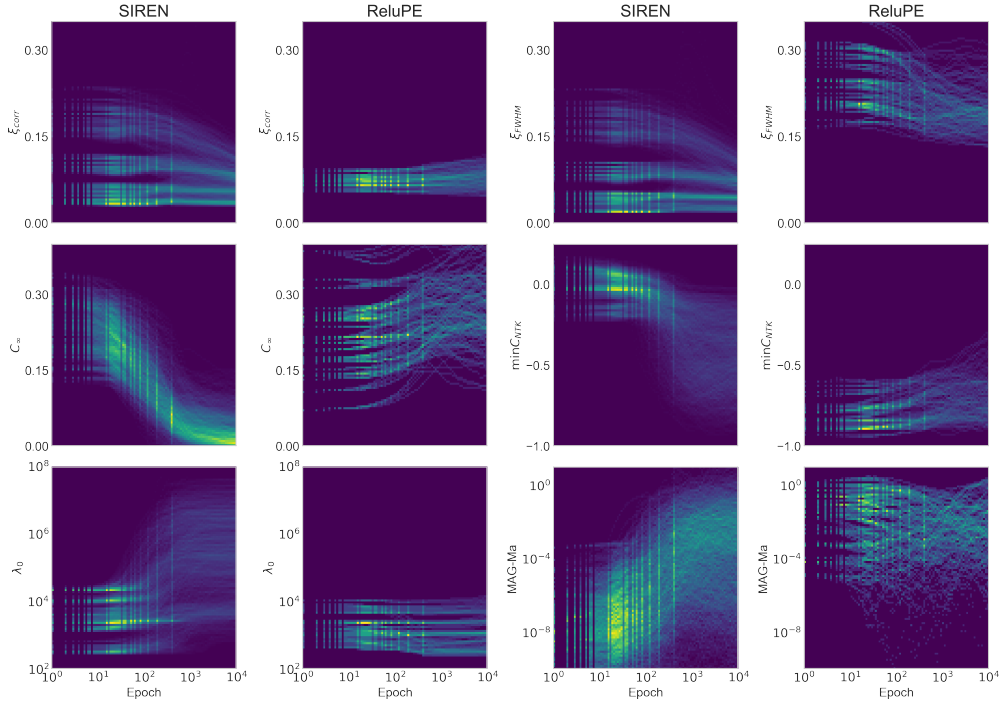

Figure 13: **Learning Trajectories for SIREN and ReLU-PE models:** Histograms visualizing the distribution of various order parameters throughout training. See Section B for full details on models and datasets used.

- At initialization, MAG-Ma is orders of magnitude lower for SIREN models than for Relu-PE models, indicating the latter are already operating in a phase where translational symmetry is broken.

In summary, while ReLU-PE models exhibit Neural Tangent Kernel alignment, it is a much slower, non-local process, that does not coincide with loss-rate collapse or translational symmetry breaking.

## E Implications of Local Image Structure on Feature Learning

### E.1 On the Relationship Between Structure Tensors and Tangent Kernels

We are now positioned to elucidate the features learned during NTK alignment. As proposed in Section 3.3, the local structure of the NTK adapts to the spatial variations in parameter gradients. In this section, we delve into the spectral consequences of this adaptation. We contend that the principal eigenvectors evolve into edge detectors, resembling the auto-correlation structure tensors

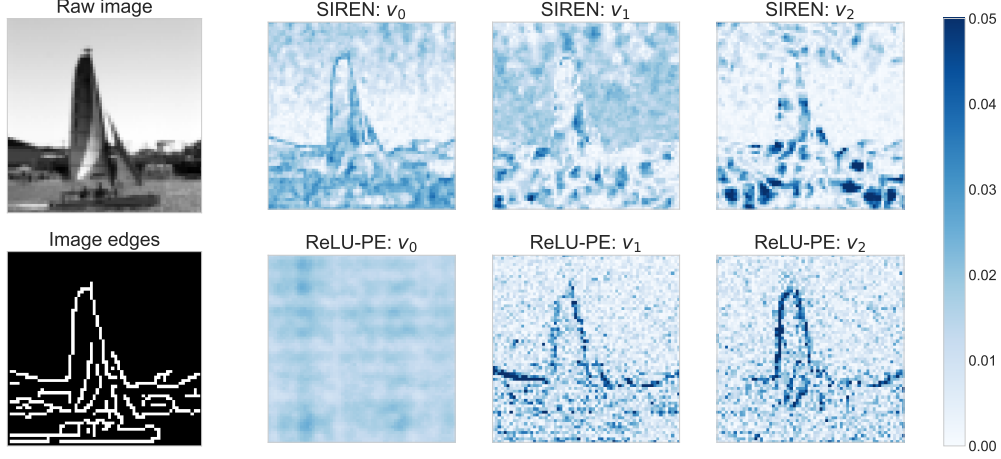

Figure 14: **NTK alignment in SIREN and ReLU-PE models:** The principal eigenvectors of the NTK at the end of training. Final  $AUC(v_1, \nabla I)$  for the ReLU-PE is 0.754, whereas  $AUC(v_0, \nabla I)$  for the SIREN model is 0.804. The training time required to achieve an edge-alignment score greater than 0.75 for the SIREN model was 453 epochs, whereas for the ReLU-PE model it was 239986 epochs.

commonly employed in traditional computer vision. This observation reinforces the concept of translation symmetry breaking: in computer vision, the utility of auto-correlation structure tensors stems from the premise that the most informative features are those that minimize redundancy. The auto-correlation function quantifies this through metrics of translational symmetry breaking.

Per the discussion in Section 3.3, the principal eigenvector is closely related to the auto-correlation function. By leveraging the decomposition of the NTK in equation 28, we may relate to the features considered in computer vision. Let us define:

$$w^{(l)}(u; x) = 1 + h^{(l-1)}(x)^\top h^{(l-1)}(x + u) \quad (111)$$

so that the largest contribution comes from the immediate neighbourhood of  $x$ . This motivates us to perform a Taylor expansion of the remaining terms as follows:

$$K_l 1 = \sum_u K_l(x, x + u) \quad (112)$$

$$= \sum_u w_l(u; x) \sum_d \frac{\partial f(x)}{\partial z_{ld}} \frac{\partial f(x + u)}{\partial z_{ld}} \quad (113)$$

$$\approx \sum_u w_l(u; x) \sum_d \left( \frac{\partial f(x)}{\partial z_{ld}} \frac{\partial f(x)}{\partial z_{ld}} + h.o.t \right) \quad (114)$$

$$= \text{tr}(A_l(x_i)) + h.o.t \quad (115)$$

Here,  $A_l$  denotes the structure tensor used in the Harris-Corner detector [48]. Accordingly, we see that  $K_l$  - and thus, the principle eigenvector - assess the extent of local translational symmetry disruption near a point  $x$ . This principle underlies feature selection in computer vision, a concept mirrored in NTK feature learning, as evidenced by the principal eigenvectors that are predominantly maximized around dataset edges and corners.

It is crucial to highlight that  $A_l$  pertains to the structure tensor of a specific layer  $l$ . Collectively, the entire DNN’s NTK facilitates feature selection across a scale pyramid.

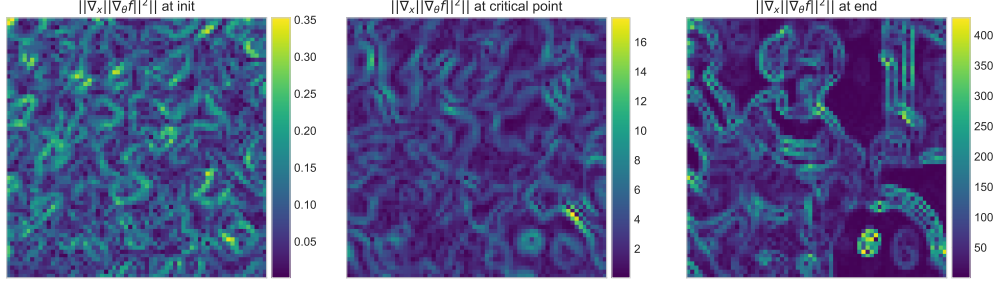

Figure 15: Evolution of spatial variation of the parameter gradients. At initialization, there is a very small amount of variance (note the scale of the variations). As the variance grows, translational symmetry is broken, and a dynamical phase transition occurs.

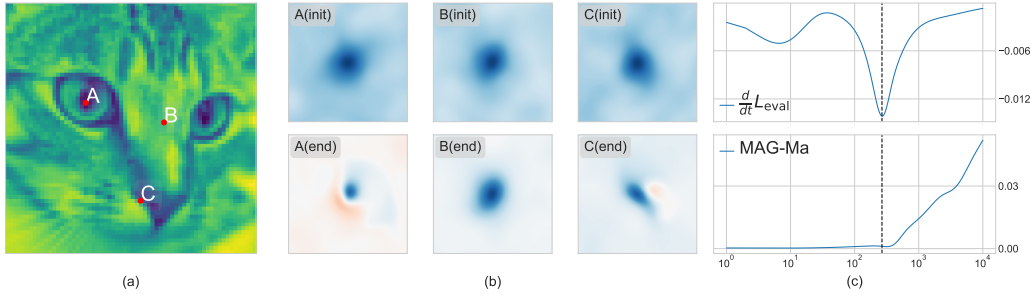

Figure 16: **Evolution of the Cosine NTK:** We visualize  $C_{NTK}(x, x + u)$  around three points  $x \in \{A, B, C\}$  for small separations  $u$ . At initialization,  $C_{NTK}$  locally resembles an isotropic, translation-invariant RBF. However, as training progresses, these symmetries are broken. MAG-Ma (described in Section E.2) is an order-parameter that monitors the original symmetry, and changes at the critical point.

## E.2 MAG-MA: Order Parameters From Translational Symmetry Breaking

While previous sections have focused on bottom-up construction of order parameters, this section adopts a top-down approach rooted in symmetry principles. In Sections 3.1-3.4, we expressed several order parameters in terms of the parameters  $a, D, H$ , characterizing the local structure of the  $C_{NTK}$ . Notably, each of these parameters is now a function of the spatial variation of the parameter gradients, whose evolution is showcased in Figure 15. This suggests it is a translation symmetry which is broken at the phase transition. Indeed, from Figure 16, we observe the  $C_{NTK}$  is an approximately stationary, isotropic kernel - a desirable property for INRs [30]. As such, the Kernel exhibits no bias for location or direction. Over the course of training, we may monitor the emergence of such a bias with the following metric :

$$||\mathbb{E}_x[\nabla_x \log ||\nabla_\theta f||^2]||^2 = ||\mathbb{E}_x[D_x/a_x^2]||^2 \quad (116)$$

We refer to this statistic as **MAG-Ma**: the **M**agnitude of the **A**verage **G**radient of the **L**og **G**radient-**F**ield **M**agnitudes. Intuitively, this order parameter captures the statistical preference for a spatial direction in the dataset. The evolution of this quantity is plotted in Figure 16, and its alignment with the other order parameters is shown in Figure 3. We see that throughout the Fast Phase of training (before the peak in the loss rate  $\dot{L}_{eval}$ ), the local structure of the  $C_{NTK}$  is statistically translation invariant, and MAG-Ma is close to zero. However, just after the critical point, it grows rapidly - coinciding with the edge memorization described in Section 3.3.

## F Evaluating Fidelity of Approximation

### F.1 Local Structure of the NTK

As described in Section 3.1, INRs are often carefully designed to ensure a diagonally dominant NTK [30, 31, 32]. In higher dimensions, diagonal dominance is equivalent to a bias towards local



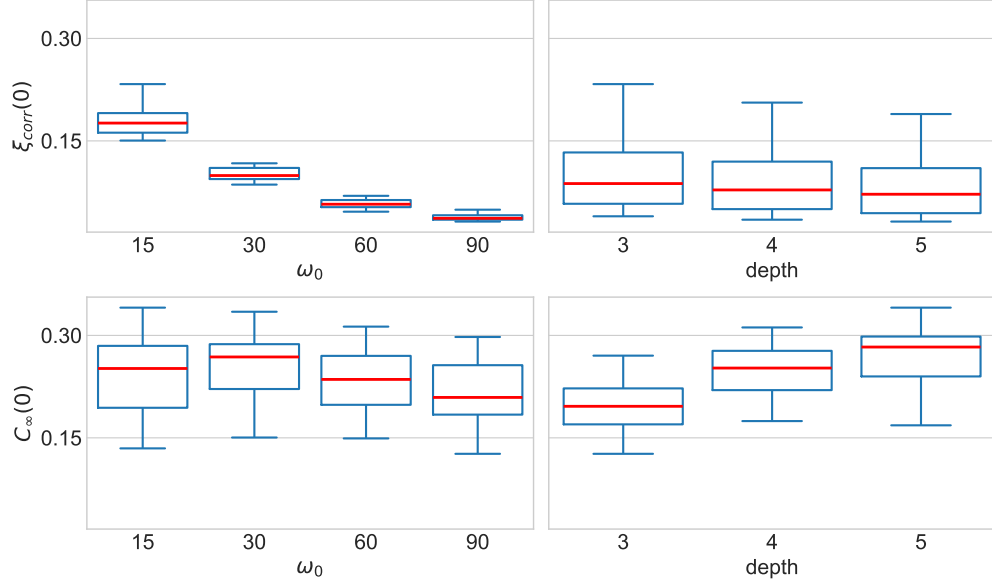

Figure 17: **Hyperparameters Affect Local NTK Structure.** Boxplots visualizing the distribution of structural parameters for the  $C_{NTK}$ . Top row: variation in the initial correlation lengthscale  $\xi_{corr}(0)$ . Bottom row: variation in the initial asymptotic value of the  $C_{NTK}$  ( $C_\infty(0)$ ).

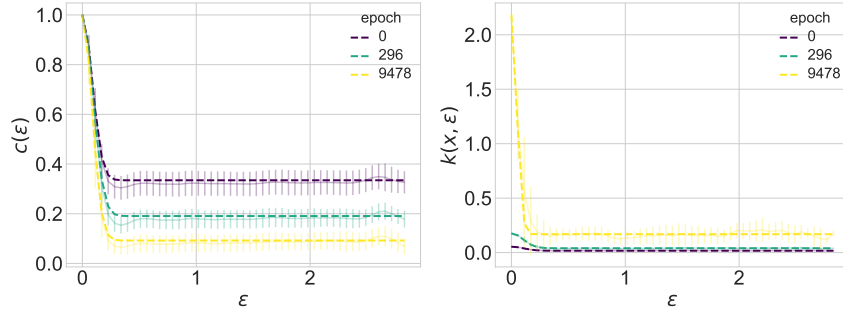

Figure 18: Visualization showing the empirical correlation function for the normalized parameter gradients. On the left-hand side is the global correlation-function for the  $C_{NTK}$ . On the right is the local-correlation function for the  $K_{NTK}$  around a test point  $x$ . Dashed lines show fitted Gaussian approximation, and error bars show variance across dataset. Over the course of training, both the global correlation lengthscale  $\xi_{corr}$ , and the terminal value  $c_\infty$ , evolve.

interactions. We see in Figure 17 the hyperparameters that most affect this local structure: we observe that, while depth has a small impact on the initial correlation lengthscale  $\xi_{corr}(0)$ , higher values of  $\omega_0$  cause the  $C_{NTK}$  to become dramatically more localized. The converse is true for the asymptotic value  $C_\infty(0)$ :  $\omega_0$  has a minor effect, but increasing depth leads to stronger interactions across large distances.

Beyond initialization, in Figure 18, we examine the evolution of the correlation function for a five-layer deep, 128-unit wide SIREN model on a  $128 \times 128$  grayscale image of a cat, with bandwidth  $\omega_0 = 30$ . Empirically, we see that the Gaussian approximation described in Section 3.1 remains valid across training, with the asymptotic value  $c_\infty$  of the  $C_{NTK}$  decaying to zero.

## F.2 Cauchy Approximation

To ascertain the fidelity of the Cauchy Approximation, we estimate the Pearson correlation between the true values of the correlation lengthscale  $\xi$  and  $\min C_{NTK}$ , and the prediction based only on the local model. We choose this metric because the identification of critical points is insensitive to linear



Table 3: **Fidelity of Cauchy Approximation:** Pearson correlation between the true order parameter and predictions using the local Cauchy Approximation. Mean and standard deviation are calculated over the spread of models and datasets described in Section B.

| depth | $\omega_0$ | $\xi$             | $\min C_{NTK}$    | $v_0$             |
|-------|------------|-------------------|-------------------|-------------------|
| 3     | 15         | $0.980 \pm 0.017$ | $0.889 \pm 0.068$ | $0.980 \pm 0.011$ |
|       | 30         | $0.924 \pm 0.110$ | $0.909 \pm 0.063$ | $0.985 \pm 0.006$ |
|       | 60         | $0.830 \pm 0.208$ | $0.946 \pm 0.043$ | $0.988 \pm 0.004$ |
|       | 90         | $0.856 \pm 0.220$ | $0.967 \pm 0.020$ | $0.986 \pm 0.006$ |
| 4     | 15         | $0.983 \pm 0.015$ | $0.925 \pm 0.059$ | $0.982 \pm 0.009$ |
|       | 30         | $0.964 \pm 0.036$ | $0.956 \pm 0.039$ | $0.985 \pm 0.007$ |
|       | 60         | $0.920 \pm 0.152$ | $0.955 \pm 0.036$ | $0.986 \pm 0.008$ |
|       | 90         | $0.974 \pm 0.026$ | $0.961 \pm 0.031$ | $0.984 \pm 0.009$ |
| 5     | 15         | $0.985 \pm 0.011$ | $0.921 \pm 0.049$ | $0.978 \pm 0.010$ |
|       | 30         | $0.969 \pm 0.023$ | $0.953 \pm 0.038$ | $0.983 \pm 0.008$ |
|       | 60         | $0.947 \pm 0.066$ | $0.966 \pm 0.033$ | $0.982 \pm 0.028$ |
|       | 90         | $0.959 \pm 0.037$ | $0.974 \pm 0.026$ | $0.982 \pm 0.010$ |

transformations. The results are shown in Table 3. Similarly, we evaluate our approximation of the principle eigenvector  $v_0$ , by looking at the absolute cosine distance between our approximation and the ground-truth.

Finally, in Section 3.3, we approximated the principal eigenvector  $v_0$  of the NTK  $K$  with the row mean  $K1/1^\top$ . The median cosine alignment between the row mean and the true  $v_0$  was found to be 0.99995 across all epochs surveyed, across all models and datasets. The IQR is 0.00446. The strength of this approximation is a testament to the extreme spectral gap of the NTK, which itself is a consequence of NTK alignment.

## G Additional Experimental Results

### G.1 Order Parameter Trajectories for Single Runs

This section contains additional illustrations of the order parameter trajectories, and the corresponding confidence region estimates, similar to the left side of Figure 3. The results are shown in Figure 19. Each model is a 5 layer deep, 128-unit wide SIREN network, trained with full-batch gradient-descent with a learning rate of  $1e-3$ .

### G.2 Influence of Hyperparameters on Order Parameter Trajectories

In this section, we perform an ablation study to understand the impact of different hyperparameters on the order parameter trajectories. The baseline model is a 5-layer 128-unit wide SIREN with  $\omega_0 = 60$ . Figures 20-22 showcase the effect of depth. Figures 23-25 showcase the effect of the bandwidth parameter  $\omega$ .

When depth (and therefore model capacity) is decreased, we observe a corresponding increase in the validation error. In shallower models, the initial gradient confusion ( $\min C_{NTK}$ ) is lower, delaying learning, and thus, the peak in the loss rate  $\dot{L}_{eval}$ . While the location of the phase transition changes, the trajectory of the order parameters shapes remain consistent, and exhibit less variance with increased depth. By contrast, there is dramatic change in the shape of the trajectories as we vary  $\omega_0$ . When  $\omega_0$  is high,  $\xi_{corr}$  starts very low, favouring interactions with immediate neighbours, leading to low overlap with the RBF. During training, the range broadens rapidly, causing  $CKA(K_X, K_{NTK})$  to grow sigmoidally at the critical point. Conversely, with low  $\omega_0$ , the range starts large but shrinks during training.

We additionally track the CKA between the NTK and a static RBF kernel with fixed bandwidth  $K_X$ , as described in 4.1. The evolution of this hyperparameter reflects the evolution of the correlation lengthscale  $\xi_{corr}$ . When this value is large (as it is when  $\omega_0$  is small), the NTK has a broad diagonal,

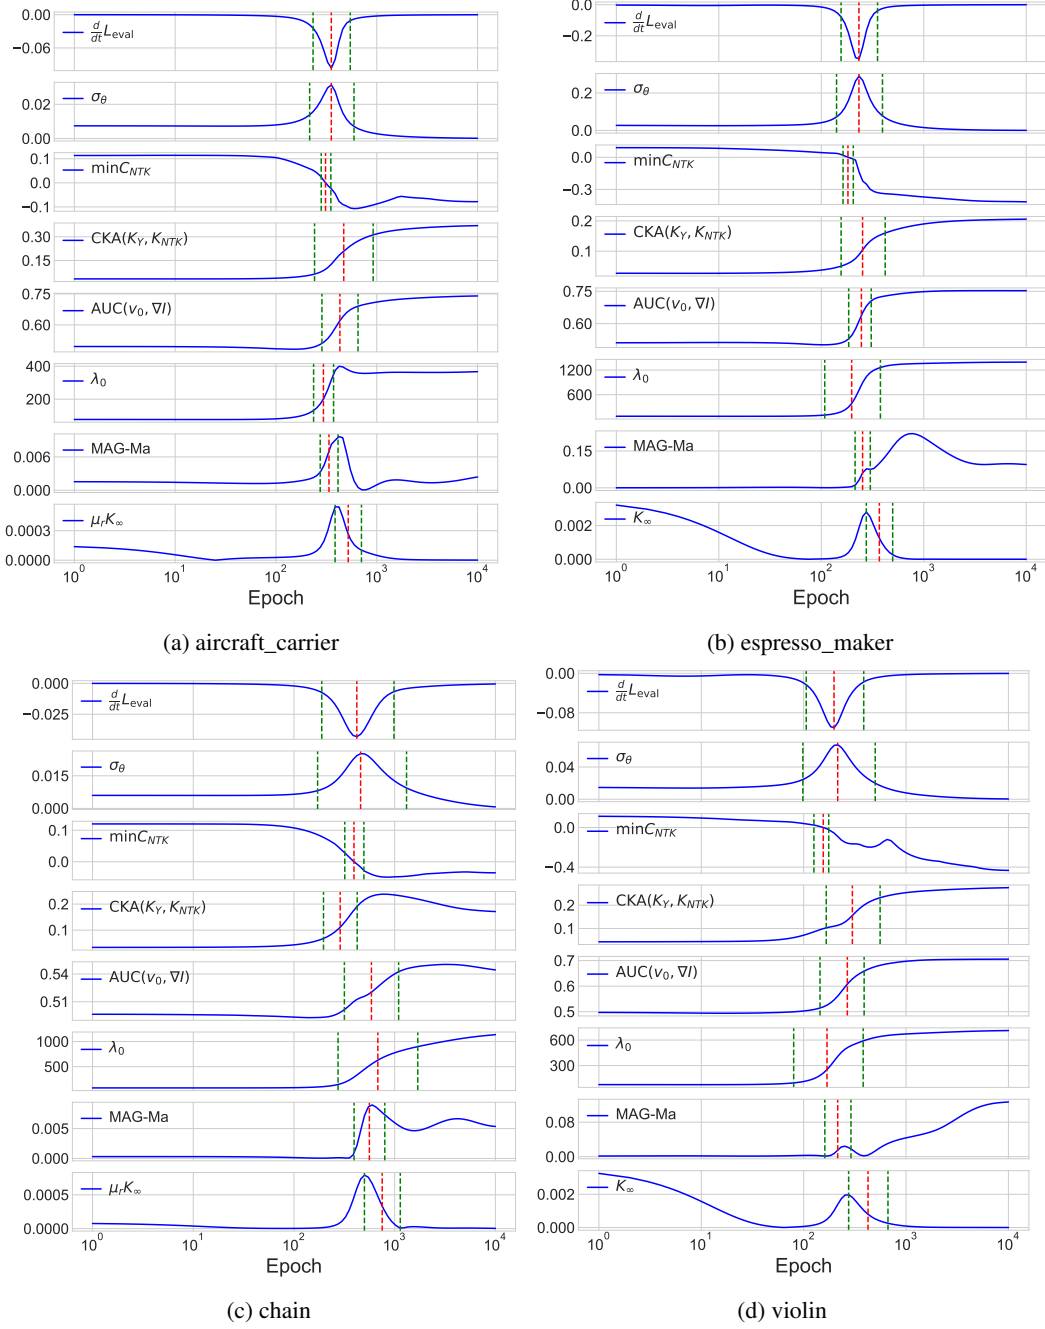

Figure 19: **Alignment of Order Parameters.** Order parameter evolution and critical points during training of a SIREN model. The red vertical lines denote the location of the critical points, and the green vertical lines denote confidence regions.

1090 and thus overlaps well with the RBF. Over the course of training,  $\xi_{corr}$  shrinks, and thus, so does  
 1091  $CKA(K_X, K_{NTK})$ .

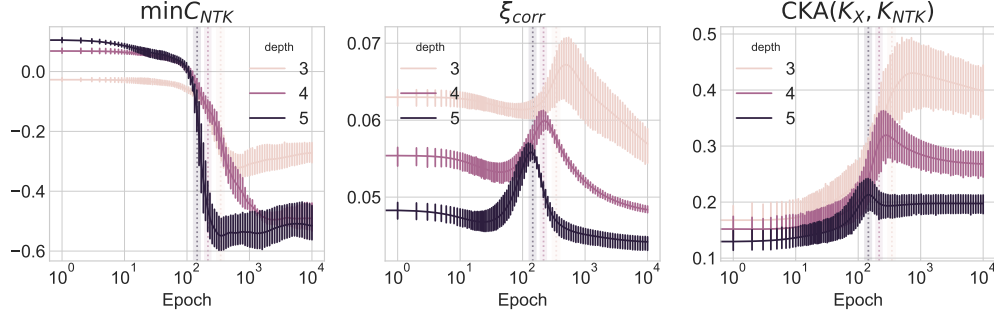

Figure 20: **Effect of depth on Critical Behaviour (Microphone):** Average MSEs, in order of ascending depth:  $2.561e^{-2} \pm 9.355e^{-5}$ ,  $2.555e^{-2} \pm 8.970e^{-5}$ ,  $2.572e^{-2} \pm 7.209e^{-5}$ . Dashed vertical lines denote the location of the peak of the loss rate  $\dot{L}_{eval}$ , marking the phase transition.

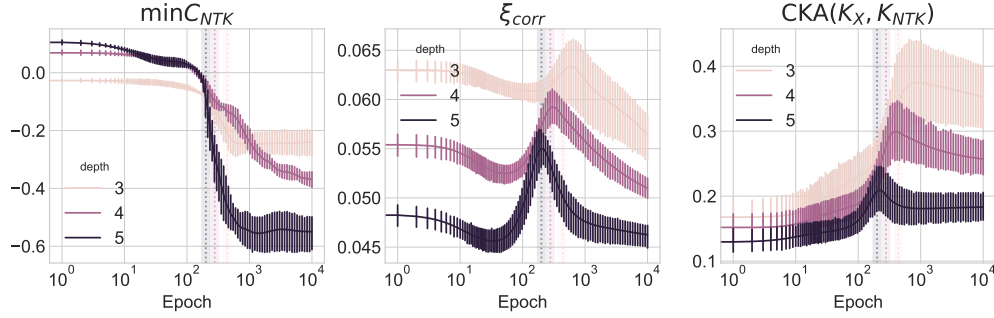

Figure 21: **Effect of depth on Critical Behaviour (Sax):** Average MSEs, in order of ascending depth:  $1.628e^{-2} \pm 1.312e^{-4}$ ,  $1.513e^{-2} \pm 3.384e^{-5}$ ,  $1.494e^{-2} \pm 6.605e^{-5}$ . Dashed vertical lines denote the location of the peak of the loss rate  $\dot{L}_{eval}$ , marking the phase transition.

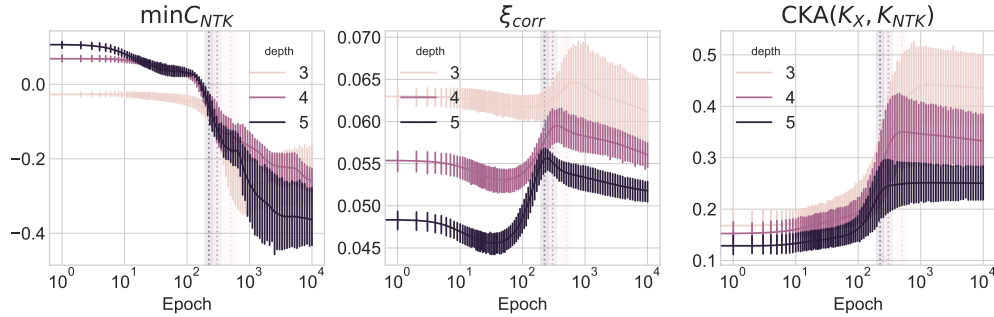

Figure 22: **Effect of depth on Critical Behaviour (Violin):** Average MSEs, in order of ascending depth:  $6.885e^{-3} \pm 1.677e^{-4}$ ,  $5.930e^{-3} \pm 5.016e^{-5}$ ,  $5.665e^{-3} \pm 3.640e^{-5}$ . Dashed vertical lines denote the location of the peak of the loss rate  $\dot{L}_{eval}$ , marking the phase transition.

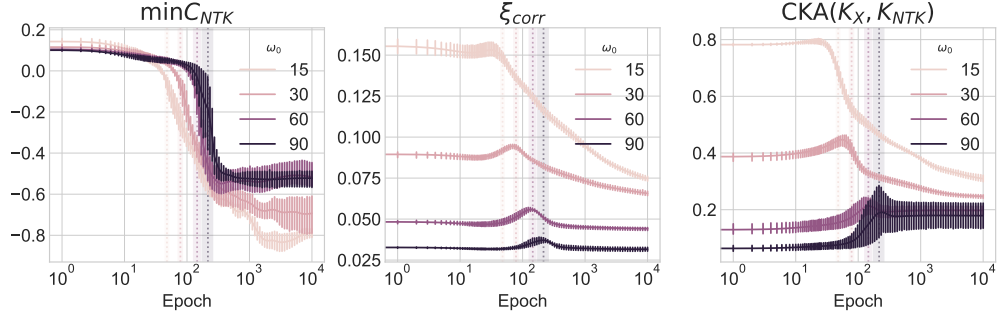

Figure 23: **Effect of  $\omega_0$  on Critical Behaviour (Microphone)**: Average MSEs, in order of ascending  $\omega_0$ :  $2.601e^{-2} \pm 1.804e^{-4}$ ,  $2.566e^{-2} \pm 1.327e^{-4}$ ,  $2.572e^{-2} \pm 7.209e^{-5}$ ,  $2.807e^{-2} \pm 7.688e^{-4}$ . Dashed vertical lines denote the location of the peak of the loss rate  $\dot{L}_{eval}$ , marking the phase transition.

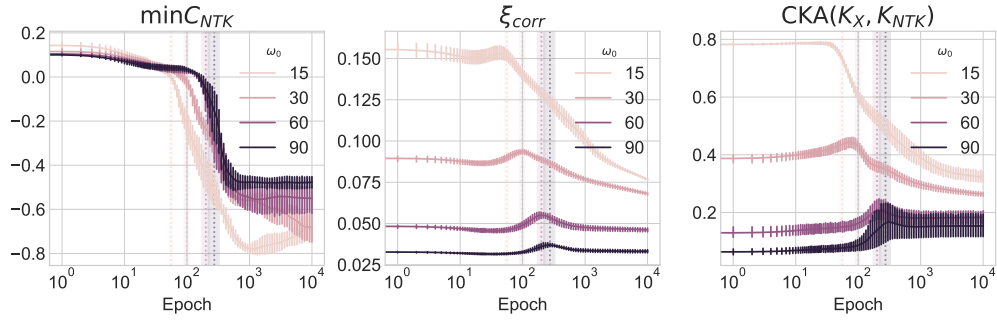

Figure 24: **Effect of  $\omega_0$  on Critical Behaviour (Sax)**: Average MSEs, in order of ascending  $\omega_0$ :  $1.680e^{-2} \pm 1.666e^{-4}$ ,  $1.561e^{-2} \pm 6.552e^{-5}$ ,  $1.494e^{-2} \pm 6.605e^{-5}$ ,  $1.639e^{-2} \pm 3.938e^{-4}$ . Dashed vertical lines denote the location of the peak of the loss rate  $\dot{L}_{eval}$ , marking the phase transition.

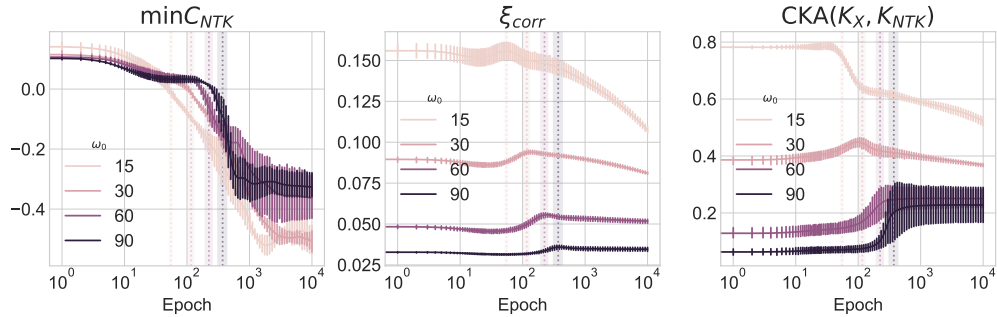

Figure 25: **Effect of  $\omega_0$  on Critical Behaviour (Violin)**: Average MSEs, in order of ascending  $\omega_0$ :  $7.223e^{-3} \pm 1.503e^{-4}$ ,  $6.305e^{-3} \pm 3.139e^{-5}$ ,  $5.665e^{-3} \pm 3.640e^{-5}$ ,  $6.698e^{-3} \pm 3.359e^{-4}$ . Dashed vertical lines denote the location of the peak of the loss rate  $\dot{L}_{eval}$ , marking the phase transition.
